# Supplementary material
Source: PubMed Central journal article supplement (PMC3974268)
Supplement: NIHMS518428-supplement-1_si_001.pdf [file NIHMS518428-supplement-1_si_001.pdf]

## Supporting Information for

# *Spectroscopic and Computational Characterization of the NO Adduct of Substrate-Bound Fe(II) Cysteine Dioxygenase: Insights into the Mechanism of O<sub>2</sub> Activation*

Elizabeth J. Blaes, <sup>1</sup> Jessica D. Gardner, <sup>1+</sup> Brian G. Fox, <sup>2</sup> Thomas C. Brunold <sup>1\*</sup>

<sup>1</sup> Department of Chemistry, University of Wisconsin-Madison, Madison, WI, 53706

<sup>2</sup> Department of Biochemistry, University of Wisconsin-Madison, Madison, WI, 53706

**Table S1. Experimentally observed vs. computationally predicted EPR parameters.** The computed parameters were obtained from single-point DFT calculations (B3LYP, TZVP/CP(PPP)/IGLO-III) on the published crystal structures.

| Species                                                                              | <b>g<sub>1</sub></b> | <b>g<sub>2</sub></b> | <b>g<sub>3</sub></b> | <b>A<sub>1</sub></b> | <b>A<sub>2</sub></b> | <b>A<sub>3</sub></b> | <b>Ref.</b> |
|--------------------------------------------------------------------------------------|----------------------|----------------------|----------------------|----------------------|----------------------|----------------------|-------------|
| [Fe(NO)(S <sub>2</sub> C <sub>2</sub> (p-tolyl) <sub>2</sub> )] <sup>2-</sup> , expt | 2.050                | 2.030                | 2.010                | 0                    | 14.4                 | 15.6                 | <i>a</i>    |
| [Fe(NO)(S <sub>2</sub> C <sub>2</sub> (p-tolyl) <sub>2</sub> )] <sup>2-</sup> , calc | 2.090                | 2.072                | 2.054                | 1                    | 6                    | 69                   | This work   |
| [(PaPy <sub>3</sub> )Fe(NO)] <sup>-</sup> , expt                                     | 2.004                | 2.004                | 1.938                | 42                   | 72                   | 11                   | <i>b</i>    |
| [(PaPy <sub>3</sub> )Fe(NO)] <sup>-</sup> , calc                                     | 2.074                | 2.032                | 2.024                | 38                   | 46                   | 11                   | This work   |
| [Fe(NO)(cyclam-ac)] <sup>+</sup> , expt                                              | 2.042                | 2.022                | 1.977                | 3                    | 75                   | 30                   | <i>c</i>    |
| [Fe(NO)(cyclam-ac)] <sup>+</sup> , calc                                              | 2.008                | 1.992                | 1.926                | 17                   | 8                    | 85                   | This work   |

<sup>a</sup> Crystal structure from the one-electron-reduced complex reported in reference 63 was used to generate starting coordinates for the geometry optimization of the {FeNO}<sup>7</sup> species. These optimized coordinates were utilized for the DFT calculation.

<sup>b</sup> From ref 59, where PaPy = *N,N*-bis(2-pyridylmethyl)amine-*N*-ethyl-2-pyridine-2-carboxamide

<sup>c</sup> From ref 58, where cyclam-ac = 1,4,8,11-tetraazacyclotetradecane-1-acetic acid

**Table S2. Experimentally observed vs. computationally predicted electronic transition energies (nm).** The computed values were obtained from INDO/S-CI calculations on the published crystal structures.

| Species                                                                | Expt               | Calc          |
|------------------------------------------------------------------------|--------------------|---------------|
| $[\text{Fe}(\text{NO})(\text{S}_2\text{C}_2(\text{p-tolyl})_2)]^{2-a}$ | 316 (sh), 420, 710 | 350, 450, 640 |
| $[(\text{PaPy}_3)\text{Fe}(\text{NO})]^{-b}$                           | 476-500            | 350-450       |
| $[\text{Fe}(\text{NO})(\text{cyclam-ac})]^{+c}$                        | 400, 560           | 350-400       |

<sup>a</sup> Crystal structure from the one-electron reduced complex reported in reference 63 was used to generate starting coordinates for the geometry optimization of the  $[\text{FeNO}]^7$  species. These optimized coordinates were utilized for the INDO calculation.

<sup>b</sup> From ref 59, where PaPy = *N,N*-bis(2-pyridylmethyl)amine-*N*-ethyl-2-pyridine-2-carboxamide

<sup>c</sup> From ref 58, where cyclam-ac = 1,4,8,11-tetraazacyclotetradecane-1-acetic acid

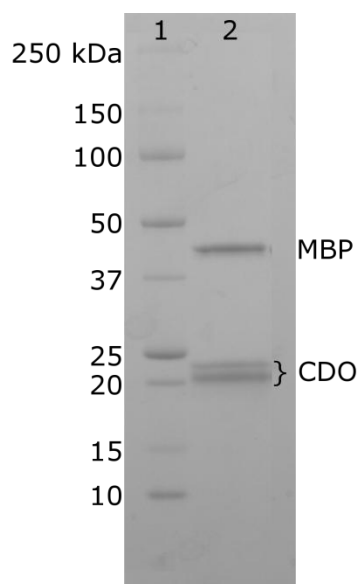

**Figure S1.** SDS-PAGE gel illustrating protein purity and degree of crosslink. Lane 1 is a protein ladder, lane 2 is a typical end-product of the protein purification.

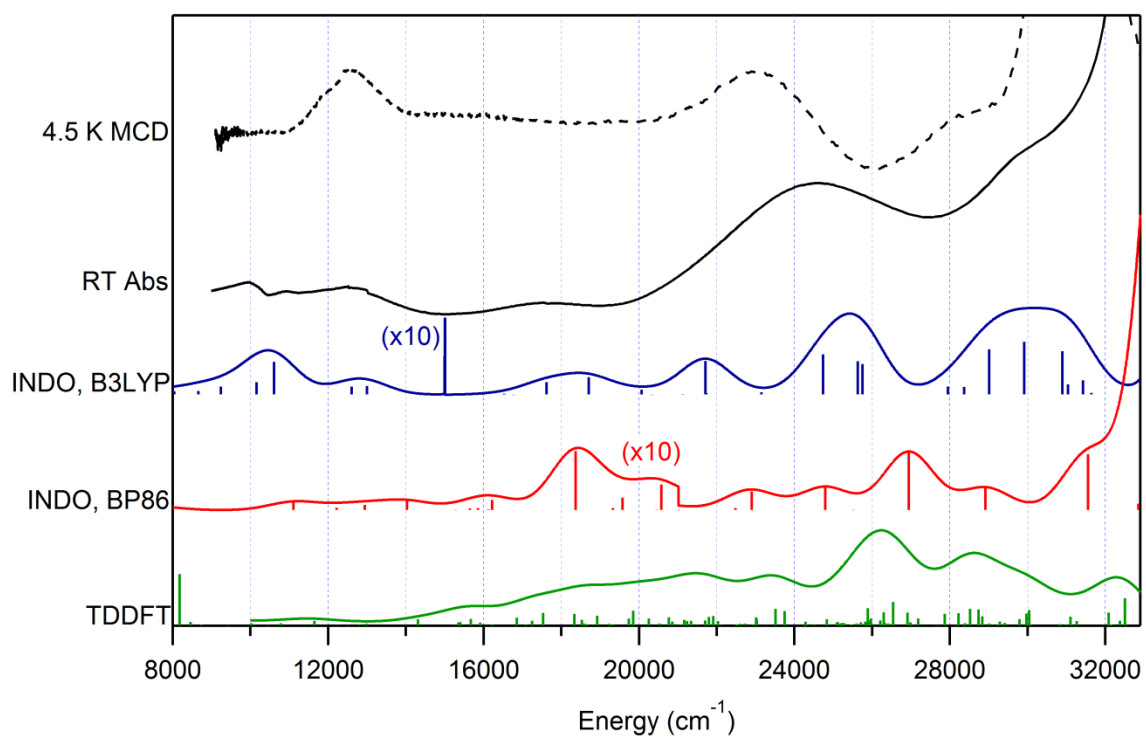

**Figure S2.** Comparison of computationally predicted Abs spectra versus the experimentally observed RT Abs and 4.5K MCD spectra of the NO adduct of Cys-Fe(II)CDO. For experimental and computational parameters, see the Experimental Section of this work.

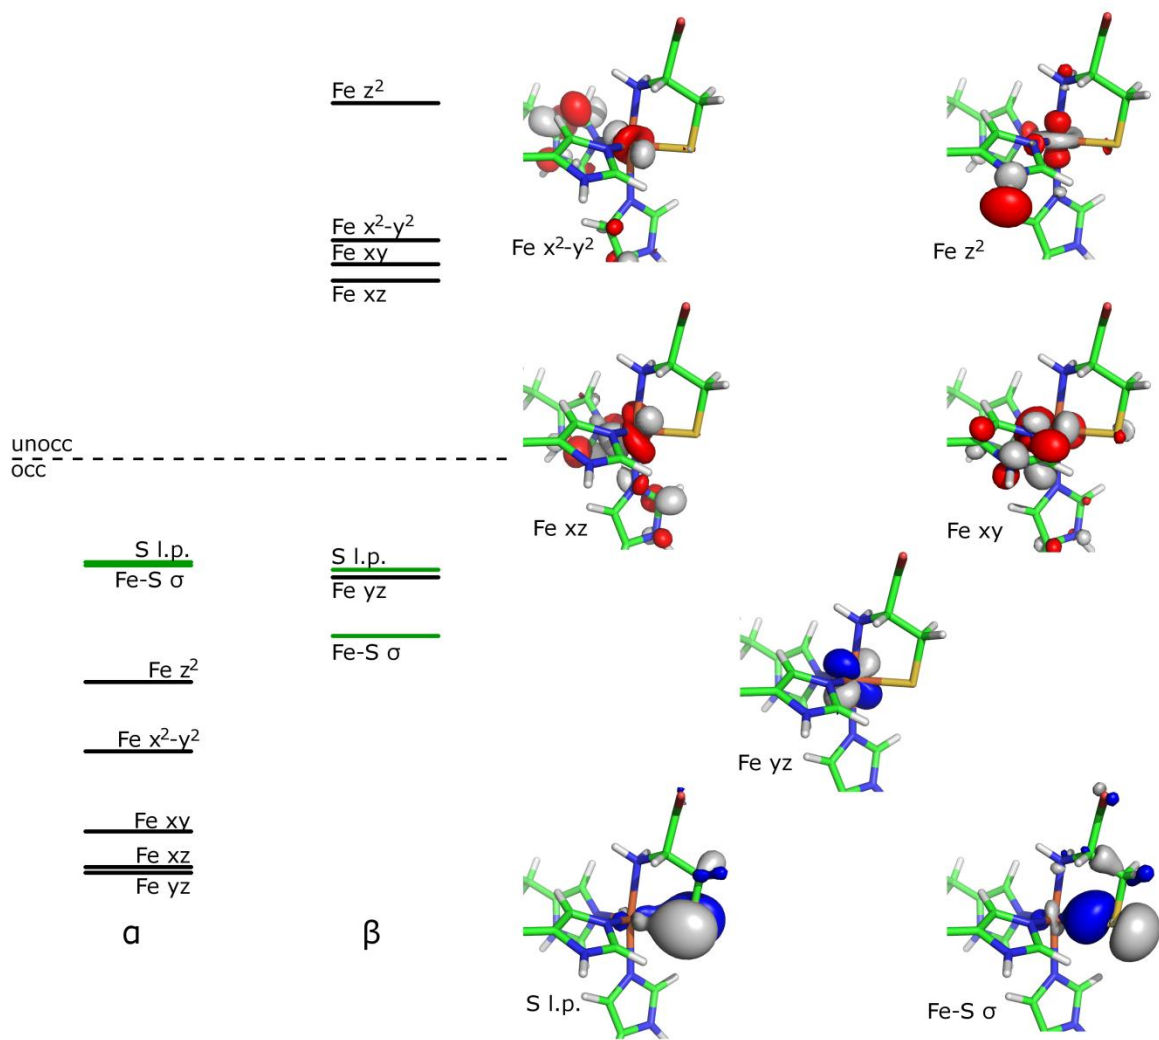

**Figure S3.** MO energy level diagram of species  $^5\mathbf{A}$ . Boundary surface plots of relevant  $\beta$  orbitals are shown. Relevant Löwdin spin densities: Fe = 3.640, S = 0.180.

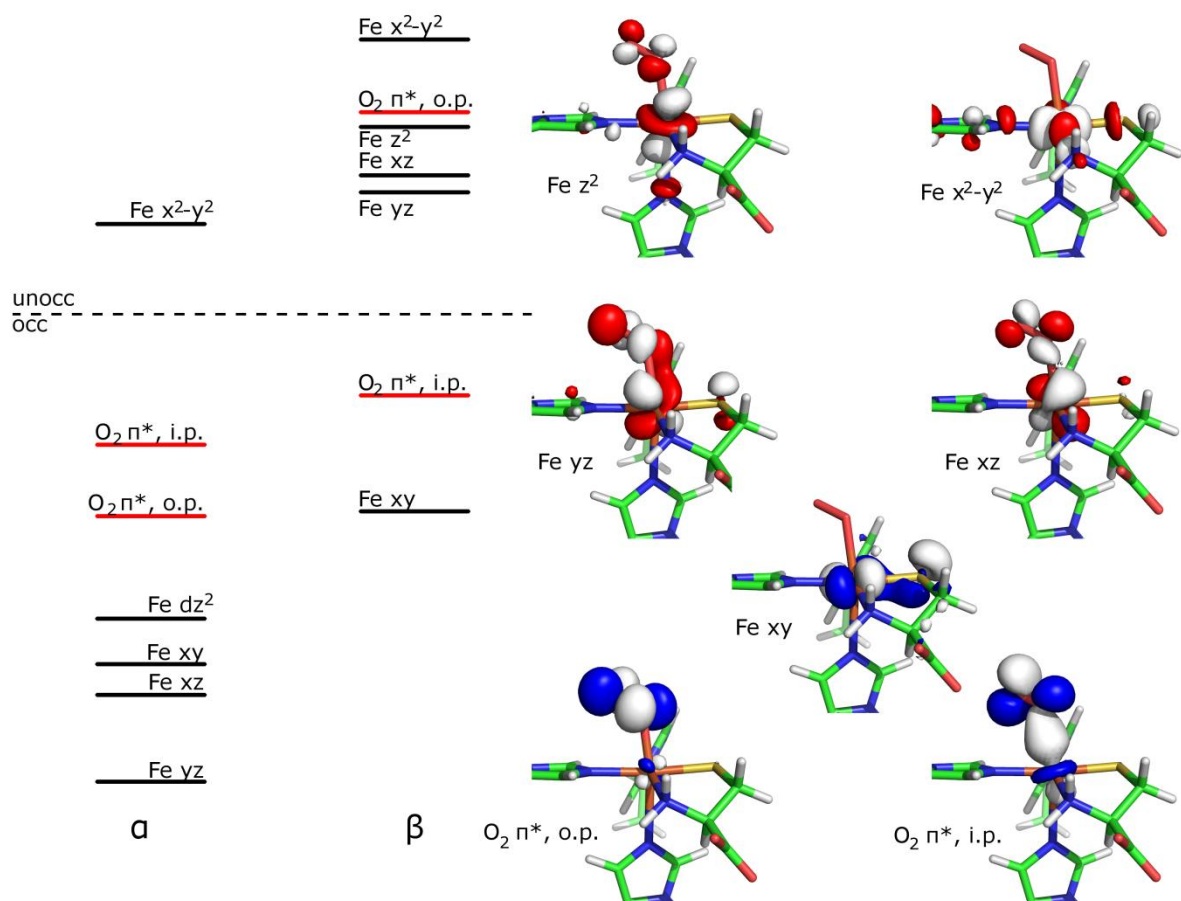

**Figure S4.** MO energy level diagram of species  $^5\mathbf{B}$ . Boundary surface plots are of relevant  $\beta$  orbitals, except the in plane  $\text{O}_2 \pi^*$  ( $\text{O}_2 \pi^*$ , i.p.). Relevant Löwdin spin densities: Fe = 2.775, S = -0.040,  $\text{O}_p$  = 0.635,  $\text{O}_d$  = 0.675.

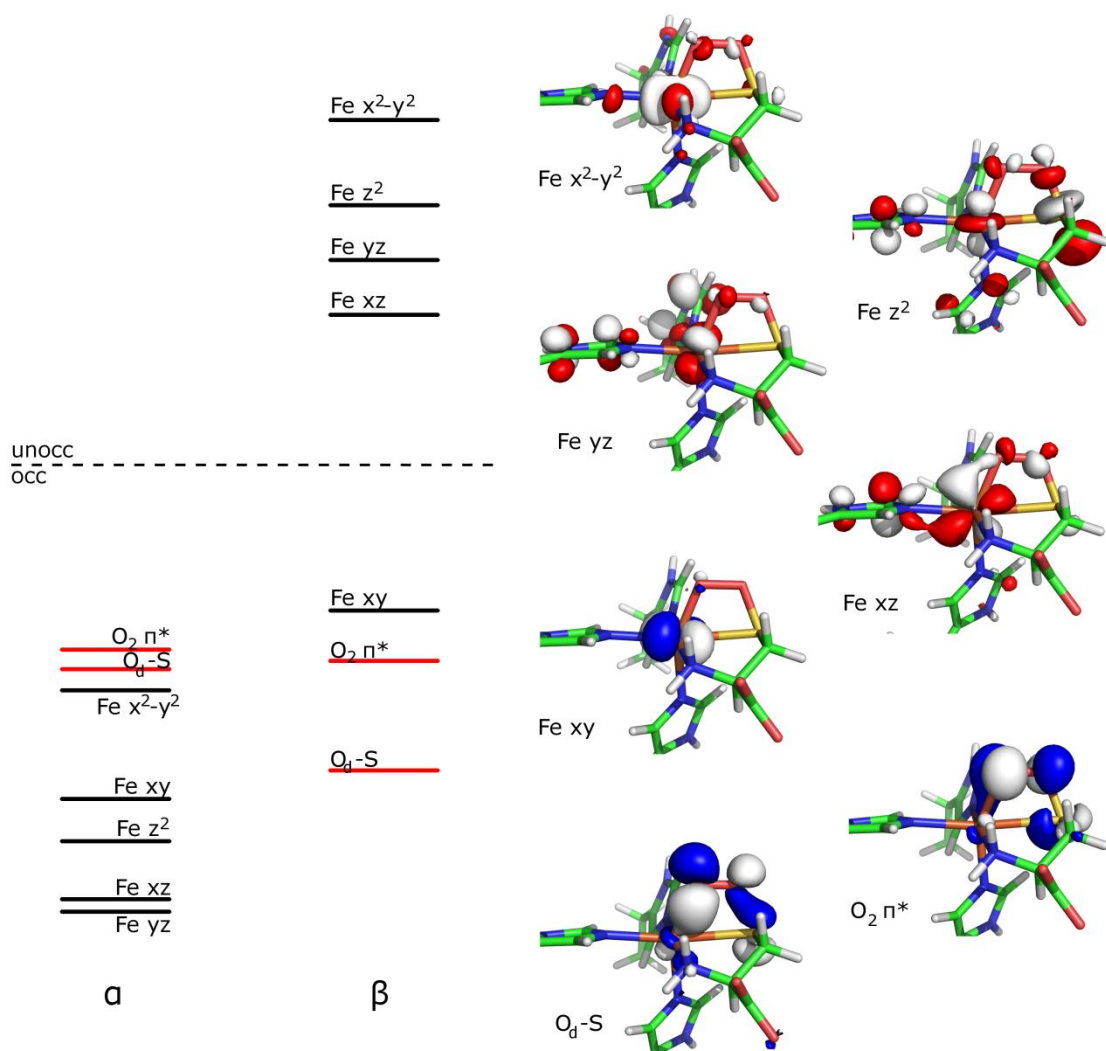

**Figure S5.** MO energy level diagram of species  ${}^5\text{C}$ . Boundary surface plots are of relevant  $\beta$  orbitals. Relevant Loewdin spin densities: Fe = 3.672, S = 0.036,  $\text{O}_p$  = 0.018,  $\text{O}_d$  = 0.135

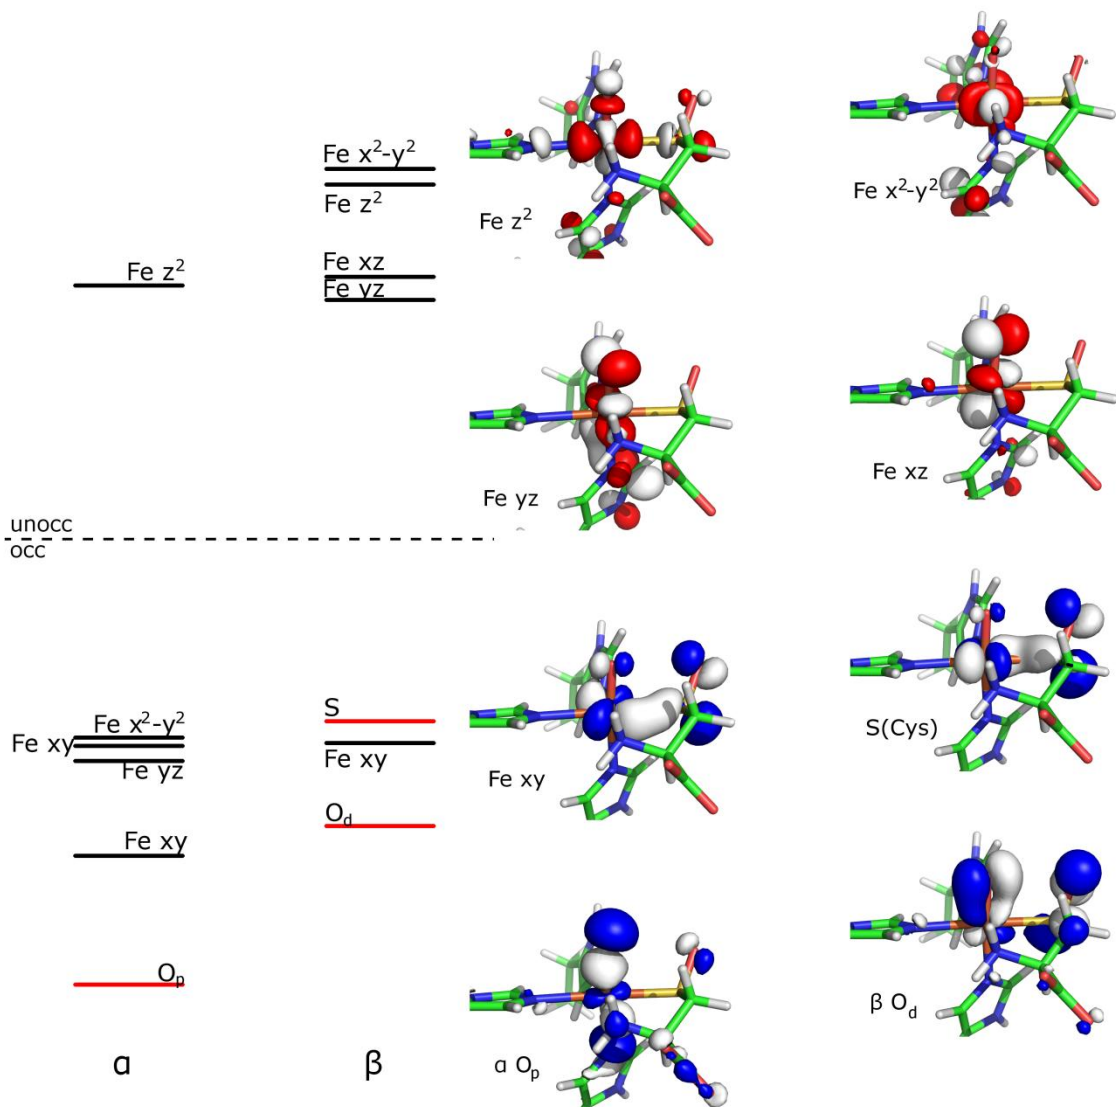

**Figure S6.** MO energy level diagram of species  ${}^3\mathbf{D}$ . Boundary surface plots are of relevant  $\beta$  orbitals, except where noted. Relevant Löwdin spin densities: Fe = 2.074, S = -0.303,  $O_p$  = 0.563,  $O_d$  = -0.294

**NO/Cys-Fe(II)CDO QM/MM-Optimized Active Site (QM Region E=-4742.70683861 Eh,  $\langle S^2 \rangle = 0.75$ )**

|    |           |           |           |
|----|-----------|-----------|-----------|
| Fe | 5.086439  | -1.032835 | 0.353754  |
| N  | 3.533691  | -1.299464 | -0.450148 |
| O  | 2.952816  | -1.309886 | -1.466051 |
| N  | 4.086670  | -0.552368 | 2.154851  |
| C  | 3.943772  | 0.924487  | 2.396863  |
| C  | 2.955713  | 1.269906  | 3.522285  |
| O  | 1.877313  | 0.535100  | 3.628215  |
| C  | 3.491024  | 1.588011  | 1.087906  |
| S  | 4.707045  | 1.228025  | -0.243878 |
| O  | 3.176420  | 2.296357  | 4.242122  |
| C  | 10.988866 | -1.633311 | 2.734030  |
| C  | 9.897750  | -0.800364 | 3.437389  |
| C  | 8.755721  | -0.427737 | 2.553765  |
| C  | 7.535812  | -1.029166 | 2.345308  |
| N  | 8.793320  | 0.616138  | 1.628769  |
| C  | 7.633329  | 0.600510  | 0.907478  |
| N  | 6.844992  | -0.380999 | 1.327508  |
| C  | 6.025207  | -6.335389 | 3.868129  |
| C  | 5.028783  | -6.353404 | 2.679495  |
| C  | 5.171504  | -5.158067 | 1.777817  |
| C  | 4.640872  | -3.880202 | 1.765127  |
| N  | 6.167892  | -5.113973 | 0.807225  |
| C  | 6.242845  | -3.853663 | 0.289916  |
| N  | 5.329623  | -3.068603 | 0.852572  |
| C  | 10.368356 | -1.591663 | -2.897988 |
| C  | 9.044860  | -1.891694 | -3.622242 |
| C  | 7.796647  | -1.606925 | -2.855616 |
| C  | 7.486111  | -1.532073 | -1.516732 |
| N  | 6.590959  | -1.356757 | -3.502385 |
| C  | 5.617429  | -1.158619 | -2.576311 |
| N  | 6.128269  | -1.250773 | -1.355211 |
| H  | 11.427289 | -1.062756 | 1.925391  |
| H  | 10.551872 | -2.597202 | 2.356054  |
| H  | 11.762364 | -1.871550 | 3.456778  |
| H  | 9.523085  | -1.396379 | 4.275424  |
| H  | 10.368163 | 0.084150  | 3.878372  |
| H  | 9.593357  | 1.195851  | 1.412631  |
| H  | 7.089019  | -1.843661 | 2.884078  |
| H  | 7.391545  | 1.300585  | 0.128266  |
| H  | 7.033792  | -6.203767 | 3.477314  |
| H  | 5.966361  | -7.227085 | 4.589271  |
| H  | 5.774839  | -5.467740 | 4.475213  |
| H  | 5.198287  | -7.276161 | 2.113319  |
| H  | 4.015443  | -6.417671 | 3.081581  |
| H  | 6.830483  | -5.863873 | 0.597539  |
| H  | 3.758261  | -3.524736 | 2.270789  |
| H  | 6.960759  | -3.603946 | -0.470994 |
| H  | 10.646759 | -2.461728 | -2.281516 |
| H  | 10.335590 | -0.576163 | -2.368167 |
| H  | 11.111190 | -1.480033 | -3.686171 |
| H  | 9.036928  | -1.288807 | -4.538890 |
| H  | 9.073849  | -2.941233 | -3.947318 |
| H  | 6.376678  | -1.404209 | -4.496202 |
| H  | 8.138667  | -1.680743 | -0.673818 |
| H  | 4.598032  | -0.940522 | -2.835054 |
| H  | 3.413601  | 2.668068  | 1.224746  |
| H  | 4.525491  | -0.976333 | 2.975795  |
| H  | 4.929862  | 1.300810  | 2.672012  |
| H  | 2.507182  | 1.205011  | 0.797878  |
| H  | 3.152942  | -0.961614 | 2.071357  |



**NO/Sec-Fe(II)CDO QM/MM-Optimized Active Site (QM Region E=-6746.07745037 Eh, <S<sup>2</sup>> = 0.75)**

|    |           |           |           |
|----|-----------|-----------|-----------|
| Fe | 5.069759  | -1.051890 | 0.325508  |
| N  | 3.518095  | -1.293015 | -0.502178 |
| O  | 2.964044  | -1.451933 | -1.522868 |
| N  | 4.044627  | -0.541357 | 2.122288  |
| C  | 3.893803  | 0.929401  | 2.400357  |
| C  | 2.930637  | 1.244633  | 3.558707  |
| O  | 1.859464  | 0.501995  | 3.673516  |
| C  | 3.379333  | 1.635940  | 1.141222  |
| Se | 4.623596  | 1.317361  | -0.356892 |
| O  | 3.157378  | 2.265739  | 4.284506  |
| C  | 10.978561 | -1.637854 | 2.726472  |
| C  | 9.877192  | -0.809428 | 3.421063  |
| C  | 8.737235  | -0.441126 | 2.531534  |
| C  | 7.513792  | -1.036579 | 2.323364  |
| N  | 8.782221  | 0.597870  | 1.601812  |
| C  | 7.624812  | 0.584006  | 0.876951  |
| N  | 6.828039  | -0.390166 | 1.299264  |
| C  | 6.016177  | -6.338982 | 3.870011  |
| C  | 5.013421  | -6.353274 | 2.686465  |
| C  | 5.153338  | -5.159469 | 1.781651  |
| C  | 4.622376  | -3.881591 | 1.764282  |
| N  | 6.143187  | -5.121243 | 0.804227  |
| C  | 6.213844  | -3.864889 | 0.277294  |
| N  | 5.304016  | -3.075801 | 0.840530  |
| C  | 10.352909 | -1.602112 | -2.905014 |
| C  | 9.037908  | -1.903635 | -3.640780 |
| C  | 7.786524  | -1.626435 | -2.879630 |
| C  | 7.471587  | -1.555548 | -1.541835 |
| N  | 6.582946  | -1.380636 | -3.530622 |
| C  | 5.605173  | -1.190533 | -2.608138 |
| N  | 6.111784  | -1.282689 | -1.384183 |
| H  | 11.430333 | -1.052228 | 1.918518  |
| H  | 10.535443 | -2.630527 | 2.347094  |
| H  | 11.748666 | -1.871521 | 3.454390  |
| H  | 9.500425  | -1.405837 | 4.257995  |
| H  | 10.340821 | 0.078139  | 3.863474  |
| H  | 9.585722  | 1.172240  | 1.384271  |
| H  | 7.060513  | -1.844726 | 2.866616  |
| H  | 7.393148  | 1.282092  | 0.093009  |
| H  | 7.023135  | -6.205038 | 3.474373  |
| H  | 5.958933  | -7.231000 | 4.591258  |
| H  | 5.769949  | -5.471382 | 4.478909  |
| H  | 5.177126  | -7.276762 | 2.119647  |
| H  | 4.002212  | -6.414788 | 3.094277  |
| H  | 6.804593  | -5.872377 | 0.595258  |
| H  | 3.743422  | -3.522526 | 2.273727  |
| H  | 6.928025  | -3.620362 | -0.488684 |
| H  | 10.629376 | -2.472300 | -2.287844 |
| H  | 10.320306 | -0.586410 | -2.375716 |
| H  | 11.100705 | -1.489817 | -3.688446 |
| H  | 9.034269  | -1.296835 | -4.554846 |
| H  | 9.073073  | -2.951792 | -3.969837 |
| H  | 6.372609  | -1.428192 | -4.525321 |
| H  | 8.122279  | -1.702546 | -0.697236 |
| H  | 4.584679  | -0.987373 | -2.873168 |
| H  | 3.307067  | 2.710365  | 1.312549  |
| H  | 4.470504  | -0.979111 | 2.942760  |
| H  | 4.883389  | 1.309251  | 2.658370  |
| H  | 2.395422  | 1.252822  | 0.859509  |
| H  | 3.112645  | -0.950608 | 2.017715  |

<sup>5</sup>A QM/MM-Optimized Active Site (QM Region E=-4612.77465483 Eh, <S<sup>2</sup>> = 6.00)

|    |           |           |           |
|----|-----------|-----------|-----------|
| Fe | 5.095898  | -1.382175 | 0.685725  |
| N  | 3.973409  | -0.767530 | 2.535915  |
| C  | 3.854779  | 0.725344  | 2.566983  |
| C  | 2.956362  | 1.208316  | 3.716605  |
| O  | 1.806190  | 0.596454  | 3.860775  |
| C  | 3.281744  | 1.252273  | 1.232355  |
| S  | 4.141986  | 0.571164  | -0.252393 |
| O  | 3.309627  | 2.200914  | 4.430236  |
| C  | 11.014828 | -1.944546 | 2.442852  |
| C  | 10.068347 | -1.055707 | 3.274034  |
| C  | 8.874907  | -0.586284 | 2.521863  |
| C  | 7.599502  | -1.091173 | 2.503330  |
| N  | 8.877552  | 0.401952  | 1.536127  |
| C  | 7.638652  | 0.437979  | 0.954909  |
| N  | 6.846162  | -0.455338 | 1.529159  |
| C  | 5.961185  | -6.452690 | 3.918957  |
| C  | 4.881366  | -6.739189 | 2.857370  |
| C  | 4.822218  | -5.610627 | 1.865836  |
| C  | 4.320956  | -4.322174 | 1.953125  |
| N  | 5.601627  | -5.600179 | 0.720253  |
| C  | 5.588456  | -4.352015 | 0.192214  |
| N  | 4.818458  | -3.536523 | 0.911435  |
| C  | 10.152623 | -2.035196 | -3.157015 |
| C  | 8.758392  | -2.154913 | -3.809583 |
| C  | 7.585557  | -1.967374 | -2.905811 |
| C  | 7.416109  | -1.938667 | -1.539340 |
| N  | 6.299919  | -1.784339 | -3.415363 |
| C  | 5.426617  | -1.651662 | -2.378355 |
| N  | 6.075999  | -1.729848 | -1.226815 |
| H  | 11.445953 | -1.351832 | 1.626375  |
| H  | 10.512600 | -2.881959 | 2.090968  |
| H  | 11.832621 | -2.265343 | 3.074962  |
| H  | 9.729079  | -1.647270 | 4.130704  |
| H  | 10.652159 | -0.224789 | 3.684755  |
| H  | 9.674840  | 0.953446  | 1.245733  |
| H  | 7.156050  | -1.826302 | 3.148427  |
| H  | 7.353679  | 1.095442  | 0.150775  |
| H  | 6.962698  | -6.403485 | 3.458557  |
| H  | 5.971677  | -7.112215 | 4.826740  |
| H  | 5.723187  | -5.472481 | 4.323469  |
| H  | 5.113847  | -7.691816 | 2.369946  |
| H  | 3.923955  | -6.860407 | 3.372335  |
| H  | 6.125969  | -6.357844 | 0.269825  |
| H  | 3.560174  | -3.946870 | 2.617079  |
| H  | 6.144710  | -4.090274 | -0.688105 |
| H  | 10.329469 | -2.900713 | -2.497524 |
| H  | 10.257088 | -1.041662 | -2.658870 |
| H  | 10.897860 | -2.067663 | -3.950619 |
| H  | 8.712113  | -1.416873 | -4.619072 |
| H  | 8.700914  | -3.135135 | -4.298057 |
| H  | 6.009105  | -1.825030 | -4.392453 |
| H  | 8.156869  | -2.041886 | -0.762808 |
| H  | 4.370889  | -1.476323 | -2.500057 |
| H  | 3.359372  | 2.341247  | 1.224401  |
| H  | 4.362477  | -1.086071 | 3.425232  |
| H  | 4.860562  | 1.121027  | 2.722305  |
| H  | 2.226527  | 0.988529  | 1.150659  |
| H  | 3.037214  | -1.166763 | 2.440295  |

**<sup>5</sup>A' QM/MM-Optimized Active Site (QM Region E=-6616.13405203 Eh, <S<sup>2</sup>> = 6.00)**

|    |           |           |           |
|----|-----------|-----------|-----------|
| Fe | 5.225746  | -1.144682 | 0.652964  |
| N  | 3.871452  | -0.634032 | 2.375276  |
| C  | 3.752163  | 0.847097  | 2.541418  |
| C  | 2.799125  | 1.258562  | 3.672900  |
| O  | 1.672291  | 0.595981  | 3.777778  |
| C  | 3.228876  | 1.504505  | 1.246854  |
| Se | 4.235168  | 0.947167  | -0.365467 |
| O  | 3.076076  | 2.269990  | 4.397449  |
| C  | 10.988154 | -1.573878 | 2.756638  |
| C  | 10.012324 | -0.688619 | 3.558186  |
| C  | 8.842088  | -0.229629 | 2.759894  |
| C  | 7.573901  | -0.751083 | 2.686070  |
| N  | 8.878868  | 0.743141  | 1.758869  |
| C  | 7.670627  | 0.746741  | 1.114544  |
| N  | 6.858265  | -0.143298 | 1.664795  |
| C  | 6.036095  | -6.280716 | 3.922044  |
| C  | 5.001198  | -6.469770 | 2.793846  |
| C  | 5.037411  | -5.341959 | 1.815020  |
| C  | 4.526395  | -4.064463 | 1.845317  |
| N  | 5.891529  | -5.350043 | 0.712414  |
| C  | 5.897143  | -4.109355 | 0.146654  |
| N  | 5.062431  | -3.304427 | 0.804314  |
| C  | 10.367543 | -1.571498 | -2.875905 |
| C  | 9.054396  | -1.854306 | -3.627286 |
| C  | 7.816324  | -1.654447 | -2.824257 |
| C  | 7.575906  | -1.622275 | -1.470720 |
| N  | 6.561148  | -1.465270 | -3.402232 |
| C  | 5.634093  | -1.339363 | -2.412129 |
| N  | 6.227013  | -1.415941 | -1.228691 |
| H  | 11.436847 | -0.988588 | 1.943136  |
| H  | 10.469867 | -2.483286 | 2.370085  |
| H  | 11.788171 | -1.895716 | 3.412484  |
| H  | 9.650549  | -1.287093 | 4.401199  |
| H  | 10.569895 | 0.146653  | 3.991300  |
| H  | 9.693673  | 1.257697  | 1.451687  |
| H  | 7.121677  | -1.502877 | 3.306361  |
| H  | 7.417429  | 1.382394  | 0.282769  |
| H  | 7.022314  | -6.152588 | 3.484610  |
| H  | 6.014164  | -7.093158 | 4.696212  |
| H  | 5.764467  | -5.369554 | 4.452608  |
| H  | 5.199864  | -7.426503 | 2.300389  |
| H  | 4.010307  | -6.549032 | 3.248225  |
| H  | 6.564095  | -6.086621 | 0.491579  |
| H  | 3.819380  | -3.648504 | 2.540285  |
| H  | 6.534681  | -3.865188 | -0.686000 |
| H  | 10.630808 | -2.453515 | -2.268085 |
| H  | 10.346054 | -0.585707 | -2.354100 |
| H  | 11.120206 | -1.461003 | -3.654569 |
| H  | 9.031190  | -1.197405 | -4.505622 |
| H  | 9.109244  | -2.882304 | -4.012653 |
| H  | 6.307586  | -1.482956 | -4.389096 |
| H  | 8.272208  | -1.763419 | -0.661619 |
| H  | 4.586489  | -1.164680 | -2.589207 |
| H  | 3.293979  | 2.588429  | 1.343524  |
| H  | 4.149932  | -1.074782 | 3.255804  |
| H  | 4.749321  | 1.226934  | 2.774251  |
| H  | 2.187549  | 1.228919  | 1.076868  |
| H  | 2.957101  | -1.015304 | 2.124406  |

**<sup>1</sup>B QM/MM-Optimized Active Site (QM Region E=-4763.11352134 Eh, <S<sup>2</sup>> = 0.00)**

|    |           |           |           |
|----|-----------|-----------|-----------|
| Fe | 5.128840  | -0.966077 | 0.384472  |
| O  | 3.535746  | -1.395749 | -0.234540 |
| O  | 3.061374  | -1.035894 | -1.366663 |
| N  | 4.122866  | -0.533504 | 2.173632  |
| C  | 3.953976  | 0.939104  | 2.400893  |
| C  | 2.961388  | 1.286295  | 3.523771  |
| O  | 1.893117  | 0.543661  | 3.637927  |
| C  | 3.490801  | 1.556715  | 1.072339  |
| S  | 4.742193  | 1.199033  | -0.221439 |
| O  | 3.183149  | 2.319426  | 4.233809  |
| C  | 10.990183 | -1.648147 | 2.726327  |
| C  | 9.917710  | -0.807135 | 3.446994  |
| C  | 8.779184  | -0.411735 | 2.571119  |
| C  | 7.553575  | -0.999390 | 2.359031  |
| N  | 8.831790  | 0.634225  | 1.649920  |
| C  | 7.675632  | 0.635193  | 0.925950  |
| N  | 6.875552  | -0.339696 | 1.340306  |
| C  | 6.020760  | -6.344134 | 3.860418  |
| C  | 5.032314  | -6.345218 | 2.663226  |
| C  | 5.184885  | -5.135417 | 1.780881  |
| C  | 4.658518  | -3.855447 | 1.785717  |
| N  | 6.198686  | -5.073892 | 0.828441  |
| C  | 6.289500  | -3.802698 | 0.342926  |
| N  | 5.370116  | -3.026583 | 0.907299  |
| C  | 10.367717 | -1.603546 | -2.905453 |
| C  | 9.031736  | -1.894353 | -3.614563 |
| C  | 7.791255  | -1.600108 | -2.836703 |
| C  | 7.504964  | -1.481889 | -1.496048 |
| N  | 6.569059  | -1.384381 | -3.468205 |
| C  | 5.610116  | -1.159964 | -2.532872 |
| N  | 6.148276  | -1.202201 | -1.320564 |
| H  | 11.442394 | -1.061896 | 1.917823  |
| H  | 10.528432 | -2.633229 | 2.351959  |
| H  | 11.767916 | -1.897949 | 3.440677  |
| H  | 9.539214  | -1.406014 | 4.281012  |
| H  | 10.403088 | 0.066024  | 3.893843  |
| H  | 9.636736  | 1.210488  | 1.442430  |
| H  | 7.099261  | -1.814754 | 2.890228  |
| H  | 7.448431  | 1.339681  | 0.146438  |
| H  | 7.031714  | -6.212105 | 3.477442  |
| H  | 5.955731  | -7.240676 | 4.570403  |
| H  | 5.770315  | -5.480041 | 4.472895  |
| H  | 5.205298  | -7.260007 | 2.085248  |
| H  | 4.015603  | -6.413729 | 3.055684  |
| H  | 6.855017  | -5.825589 | 0.605936  |
| H  | 3.762648  | -3.511243 | 2.276216  |
| H  | 7.018844  | -3.539995 | -0.402570 |
| H  | 10.644451 | -2.473834 | -2.288968 |
| H  | 10.347328 | -0.587367 | -2.375652 |
| H  | 11.103402 | -1.500392 | -3.701357 |
| H  | 9.019014  | -1.293843 | -4.532972 |
| H  | 9.049163  | -2.944668 | -3.937923 |
| H  | 6.339966  | -1.455634 | -4.457733 |
| H  | 8.173401  | -1.601918 | -0.661069 |
| H  | 4.573597  | -0.963923 | -2.745561 |
| H  | 3.355122  | 2.634424  | 1.171406  |
| H  | 4.567181  | -0.953345 | 2.993825  |
| H  | 4.931284  | 1.340021  | 2.672992  |
| H  | 2.539637  | 1.105783  | 0.769011  |
| H  | 3.196457  | -0.959351 | 2.077114  |

**<sup>3</sup>B QM/MM-Optimized Active Site (QM Region E=-4763.13221319 Eh, <S<sup>2</sup>> = 2.00)**

|    |           |           |           |
|----|-----------|-----------|-----------|
| Fe | 5.145346  | -0.962849 | 0.404198  |
| O  | 3.583685  | -1.551887 | -0.491301 |
| O  | 2.811890  | -0.877982 | -1.271700 |
| N  | 4.028118  | -0.550555 | 2.101023  |
| C  | 3.911833  | 0.921063  | 2.374427  |
| C  | 2.935462  | 1.288991  | 3.504749  |
| O  | 1.852914  | 0.570047  | 3.639741  |
| C  | 3.496724  | 1.586851  | 1.057170  |
| S  | 4.740302  | 1.152709  | -0.225478 |
| O  | 3.186617  | 2.321081  | 4.205766  |
| C  | 10.988787 | -1.637404 | 2.726612  |
| C  | 9.922420  | -0.797512 | 3.458793  |
| C  | 8.776124  | -0.396553 | 2.595280  |
| C  | 7.539962  | -0.969972 | 2.403994  |
| N  | 8.830094  | 0.643140  | 1.667374  |
| C  | 7.665315  | 0.655076  | 0.957719  |
| N  | 6.857363  | -0.306401 | 1.389578  |
| C  | 6.021733  | -6.333871 | 3.869070  |
| C  | 5.030794  | -6.347721 | 2.674176  |
| C  | 5.175886  | -5.144003 | 1.783119  |
| C  | 4.646312  | -3.866130 | 1.784215  |
| N  | 6.184972  | -5.084784 | 0.824354  |
| C  | 6.269102  | -3.816804 | 0.331271  |
| N  | 5.350772  | -3.040837 | 0.897540  |
| C  | 10.365659 | -1.602458 | -2.905163 |
| C  | 9.028932  | -1.886408 | -3.615274 |
| C  | 7.794443  | -1.597419 | -2.827781 |
| C  | 7.527423  | -1.475987 | -1.483280 |
| N  | 6.560998  | -1.396227 | -3.442195 |
| C  | 5.613577  | -1.180286 | -2.491760 |
| N  | 6.174007  | -1.210162 | -1.289242 |
| H  | 11.409010 | -1.049529 | 1.918233  |
| H  | 10.552800 | -2.619311 | 2.351250  |
| H  | 11.770136 | -1.893300 | 3.434862  |
| H  | 9.550348  | -1.398955 | 4.293849  |
| H  | 10.412534 | 0.073451  | 3.904821  |
| H  | 9.639449  | 1.208493  | 1.447322  |
| H  | 7.078904  | -1.771382 | 2.951028  |
| H  | 7.438436  | 1.353368  | 0.172693  |
| H  | 7.031367  | -6.201370 | 3.482447  |
| H  | 5.960563  | -7.227757 | 4.486887  |
| H  | 5.769777  | -5.467764 | 4.477708  |
| H  | 5.205880  | -7.266155 | 2.102750  |
| H  | 4.015248  | -6.417272 | 3.069622  |
| H  | 6.842563  | -5.835869 | 0.603473  |
| H  | 3.753840  | -3.520481 | 2.279783  |
| H  | 6.995335  | -3.554114 | -0.417649 |
| H  | 10.638916 | -2.474872 | -2.289983 |
| H  | 10.352323 | -0.586374 | -2.374440 |
| H  | 11.101444 | -1.502908 | -3.701333 |
| H  | 9.014561  | -1.279381 | -4.529342 |
| H  | 9.044580  | -2.934642 | -3.945259 |
| H  | 6.320370  | -1.468348 | -4.429241 |
| H  | 8.205645  | -1.591331 | -0.655182 |
| H  | 4.577727  | -0.990154 | -2.710474 |
| H  | 3.442784  | 2.670101  | 1.170605  |
| H  | 4.393119  | -1.014641 | 2.936266  |
| H  | 4.903977  | 1.270583  | 2.664018  |
| H  | 2.519927  | 1.213978  | 0.732622  |
| H  | 3.093623  | -0.935653 | 1.925855  |

**<sup>5</sup>B QM/MM-Optimized Active Site (QM Region E=-4763.17143114 Eh, <S<sup>2</sup>> = 6.00)**

|    |           |           |           |
|----|-----------|-----------|-----------|
| Fe | 4.842868  | -2.154089 | -0.223197 |
| O  | 3.450618  | -3.221962 | -1.531797 |
| O  | 3.804763  | -4.362601 | -2.019453 |
| N  | 3.950852  | -1.259659 | 1.441065  |
| C  | 4.124371  | 0.231637  | 1.421863  |
| C  | 3.545463  | 1.010166  | 2.611709  |
| O  | 2.515857  | 0.544640  | 3.255732  |
| C  | 3.561215  | 0.710771  | 0.086057  |
| S  | 4.483335  | -0.195407 | -1.227541 |
| O  | 4.129953  | 2.113843  | 2.843305  |
| C  | 11.075076 | -2.203174 | 3.015773  |
| C  | 9.796147  | -1.482686 | 3.496816  |
| C  | 8.759228  | -1.230254 | 2.447816  |
| C  | 7.707854  | -1.992963 | 1.983490  |
| N  | 8.682351  | -0.055501 | 1.702993  |
| C  | 7.618566  | -0.159130 | 0.841785  |
| N  | 6.994908  | -1.316339 | 1.004361  |
| C  | 5.913750  | -6.709893 | 4.056843  |
| C  | 4.837636  | -6.970005 | 2.979675  |
| C  | 4.898091  | -5.943504 | 1.883490  |
| C  | 4.379823  | -4.669438 | 1.729781  |
| N  | 5.796802  | -6.068695 | 0.831698  |
| C  | 5.829185  | -4.912397 | 0.113324  |
| N  | 4.989155  | -4.031920 | 0.636308  |
| C  | 10.526094 | -2.099697 | -2.622873 |
| C  | 9.431028  | -2.569608 | -3.593152 |
| C  | 8.058221  | -2.544493 | -3.021766 |
| C  | 7.570907  | -2.586543 | -1.736635 |
| N  | 6.931815  | -2.391726 | -3.823733 |
| C  | 5.827921  | -2.348255 | -3.031603 |
| N  | 6.187039  | -2.461660 | -1.757721 |
| H  | 11.574014 | -1.577703 | 2.281387  |
| H  | 10.807055 | -3.226567 | 2.599882  |
| H  | 11.730770 | -2.345583 | 3.866422  |
| H  | 9.358298  | -2.087072 | 4.299010  |
| H  | 10.094333 | -0.541504 | 3.970664  |
| H  | 9.375470  | 0.681726  | 1.692214  |
| H  | 7.443546  | -3.002407 | 2.242352  |
| H  | 7.346374  | 0.606583  | 0.135351  |
| H  | 6.902807  | -6.622408 | 3.608112  |
| H  | 5.893814  | -7.386557 | 4.981717  |
| H  | 5.660473  | -5.734065 | 4.459566  |
| H  | 4.982319  | -7.978455 | 2.581775  |
| H  | 3.860381  | -6.948628 | 3.469223  |
| H  | 6.459406  | -6.834519 | 0.710016  |
| H  | 3.537181  | -4.228121 | 2.239435  |
| H  | 6.502909  | -4.766926 | -0.708975 |
| H  | 10.710212 | -2.919960 | -1.907732 |
| H  | 10.319704 | -1.062488 | -2.157096 |
| H  | 11.425294 | -1.976393 | -3.224338 |
| H  | 9.454471  | -1.919011 | -4.470600 |
| H  | 9.705448  | -3.570880 | -3.956296 |
| H  | 6.875545  | -2.381616 | -4.841411 |
| H  | 8.112459  | -2.703862 | -0.816325 |
| H  | 4.822454  | -2.246554 | -3.398762 |
| H  | 3.720439  | 1.782255  | -0.046443 |
| H  | 4.319532  | -1.625855 | 2.321269  |
| H  | 5.195378  | 0.423704  | 1.447944  |
| H  | 2.492200  | 0.495419  | 0.015195  |
| H  | 2.945399  | -1.482142 | 1.425217  |

**<sup>1</sup>B' QM/MM-Optimized Active Site (QM Region E=-6766.48307313 Eh, <S<sup>2</sup>> = 0.00)**

|    |           |           |           |
|----|-----------|-----------|-----------|
| Fe | 5.122676  | -0.961568 | 0.368087  |
| O  | 3.519322  | -1.382858 | -0.250837 |
| O  | 3.050955  | -0.989381 | -1.378402 |
| N  | 4.098365  | -0.503524 | 2.153749  |
| C  | 3.909459  | 0.962530  | 2.411220  |
| C  | 2.936374  | 1.273692  | 3.563760  |
| O  | 1.878039  | 0.518764  | 3.681222  |
| C  | 3.385085  | 1.614604  | 1.125478  |
| Se | 4.689061  | 1.309018  | -0.318468 |
| O  | 3.157869  | 2.300069  | 4.284047  |
| C  | 10.984710 | -1.641842 | 2.721907  |
| C  | 9.907864  | -0.804699 | 3.441319  |
| C  | 8.771495  | -0.407340 | 2.563167  |
| C  | 7.541461  | -0.986238 | 2.349917  |
| N  | 8.833577  | 0.636045  | 1.640129  |
| C  | 7.679567  | 0.643132  | 0.913623  |
| N  | 6.869365  | -0.323641 | 1.327597  |
| C  | 6.019028  | -6.339372 | 3.865916  |
| C  | 5.023410  | -6.337363 | 2.674551  |
| C  | 5.171773  | -5.127407 | 1.790999  |
| C  | 4.646136  | -3.846742 | 1.795399  |
| N  | 6.179577  | -5.068866 | 0.832133  |
| C  | 6.267953  | -3.799129 | 0.342325  |
| N  | 5.352123  | -3.020566 | 0.909354  |
| C  | 10.358857 | -1.605982 | -2.909557 |
| C  | 9.027023  | -1.897170 | -3.625388 |
| C  | 7.784098  | -1.610240 | -2.849961 |
| C  | 7.498398  | -1.483720 | -1.509971 |
| N  | 6.559216  | -1.412826 | -3.482063 |
| C  | 5.598874  | -1.191508 | -2.547362 |
| N  | 6.139517  | -1.216380 | -1.334997 |
| H  | 11.436950 | -1.055217 | 1.913877  |
| H  | 10.525419 | -2.627605 | 2.345867  |
| H  | 11.761633 | -1.890430 | 3.437513  |
| H  | 9.527663  | -1.406144 | 4.272824  |
| H  | 10.390718 | 0.068171  | 3.891776  |
| H  | 9.642371  | 1.207132  | 1.433281  |
| H  | 7.080060  | -1.796506 | 2.883358  |
| H  | 7.462981  | 1.349493  | 0.132843  |
| H  | 7.028109  | -6.206612 | 3.477806  |
| H  | 5.957143  | -7.236389 | 4.579699  |
| H  | 5.772428  | -5.475712 | 4.480663  |
| H  | 5.191481  | -7.252066 | 2.094859  |
| H  | 4.009144  | -6.404952 | 3.073493  |
| H  | 6.834291  | -5.821604 | 0.608294  |
| H  | 3.754311  | -3.500417 | 2.291896  |
| H  | 6.994465  | -3.539383 | -0.407136 |
| H  | 10.633074 | -2.476383 | -2.292054 |
| H  | 10.339545 | -0.588985 | -2.381261 |
| H  | 11.097561 | -1.503948 | -3.702855 |
| H  | 9.016041  | -1.292878 | -4.541431 |
| H  | 9.048660  | -2.946157 | -3.953010 |
| H  | 6.330906  | -1.489906 | -4.471504 |
| H  | 8.168120  | -1.591845 | -0.674370 |
| H  | 4.559116  | -1.010727 | -2.759791 |
| H  | 3.233647  | 2.685416  | 1.258473  |
| H  | 4.538897  | -0.929770 | 2.972680  |
| H  | 4.885709  | 1.375286  | 2.669899  |
| H  | 2.444959  | 1.146549  | 0.819062  |
| H  | 3.177004  | -0.937928 | 2.044665  |

**<sup>3</sup>B' QM/MM-Optimized Active Site (QM Region E=-6766.50082484 Eh, <S<sup>2</sup>> = 2.00)**

|    |           |           |           |
|----|-----------|-----------|-----------|
| Fe | 5.127849  | -0.976473 | 0.382668  |
| O  | 3.558051  | -1.548886 | -0.519038 |
| O  | 2.775325  | -0.866569 | -1.268384 |
| N  | 4.005850  | -0.532108 | 2.084086  |
| C  | 3.878527  | 0.932018  | 2.396947  |
| C  | 2.918285  | 1.257985  | 3.555664  |
| O  | 1.843846  | 0.526743  | 3.684342  |
| C  | 3.403897  | 1.654871  | 1.133331  |
| Se | 4.672426  | 1.255756  | -0.324047 |
| O  | 3.164662  | 2.280484  | 4.272920  |
| C  | 10.978473 | -1.644247 | 2.711262  |
| C  | 9.904581  | -0.806251 | 3.435909  |
| C  | 8.760808  | -0.407119 | 2.567220  |
| C  | 7.520649  | -0.972677 | 2.375647  |
| N  | 8.822883  | 0.629011  | 1.636274  |
| C  | 7.659564  | 0.645199  | 0.924434  |
| N  | 6.842281  | -0.308280 | 1.357087  |
| C  | 6.012896  | -6.335762 | 3.880136  |
| C  | 5.013809  | -6.347591 | 2.692018  |
| C  | 5.156131  | -5.146102 | 1.796710  |
| C  | 4.629701  | -3.866597 | 1.795256  |
| N  | 6.157515  | -5.093918 | 0.829815  |
| C  | 6.239899  | -3.828506 | 0.328993  |
| N  | 5.327505  | -3.046858 | 0.897526  |
| C  | 10.343773 | -1.628613 | -2.919303 |
| C  | 9.011143  | -1.913239 | -3.634991 |
| C  | 7.774404  | -1.626419 | -2.851689 |
| C  | 7.504135  | -1.499234 | -1.508337 |
| N  | 6.541576  | -1.437138 | -3.469842 |
| C  | 5.590959  | -1.223826 | -2.521704 |
| N  | 6.148747  | -1.241922 | -1.317029 |
| H  | 11.429664 | -1.058640 | 1.902041  |
| H  | 10.515074 | -2.628457 | 2.336794  |
| H  | 11.757168 | -1.895579 | 3.424159  |
| H  | 9.529795  | -1.407221 | 4.270252  |
| H  | 10.390424 | 0.066698  | 3.883118  |
| H  | 9.636276  | 1.187801  | 1.414587  |
| H  | 7.054259  | -1.769630 | 2.925060  |
| H  | 7.442080  | 1.343873  | 0.137156  |
| H  | 7.020400  | -6.204610 | 3.486889  |
| H  | 5.954291  | -7.228067 | 4.600439  |
| H  | 5.766470  | -5.468140 | 4.488989  |
| H  | 5.181885  | -7.267631 | 2.120922  |
| H  | 4.000944  | -6.413299 | 3.095013  |
| H  | 6.813318  | -5.846714 | 0.609331  |
| H  | 3.743105  | -3.516038 | 2.297842  |
| H  | 6.962187  | -3.571706 | -0.425730 |
| H  | 10.616419 | -2.499644 | -2.302328 |
| H  | 10.331676 | -0.611249 | -2.390367 |
| H  | 11.081787 | -1.530059 | -3.713633 |
| H  | 8.999930  | -1.305670 | -4.548820 |
| H  | 9.029244  | -2.961359 | -3.965312 |
| H  | 6.304595  | -1.513047 | -4.457555 |
| H  | 8.181634  | -1.605644 | -0.678504 |
| H  | 4.554208  | -1.049097 | -2.747208 |
| H  | 3.360004  | 2.731766  | 1.293443  |
| H  | 4.371240  | -1.006980 | 2.913075  |
| H  | 4.872554  | 1.285620  | 2.675308  |
| H  | 2.420270  | 1.292525  | 0.821912  |
| H  | 3.072142  | -0.918731 | 1.908432  |



**<sup>5</sup>B' QM/MM-Optimized Active Site (QM Region E=-6766.48728517 Eh, <S<sup>2</sup>> = 6.00)**

|    |           |           |           |
|----|-----------|-----------|-----------|
| Fe | 5.104944  | -1.180683 | 0.490107  |
| O  | 3.287251  | -0.699539 | -0.567062 |
| O  | 2.819829  | -1.150502 | -1.709251 |
| N  | 3.869910  | -0.513582 | 2.249810  |
| C  | 3.758823  | 0.963851  | 2.461422  |
| C  | 2.847330  | 1.353024  | 3.639967  |
| O  | 1.748180  | 0.663279  | 3.809651  |
| C  | 3.189826  | 1.652437  | 1.210112  |
| Se | 4.302681  | 1.420741  | -0.382267 |
| O  | 3.146370  | 2.381405  | 4.326423  |
| C  | 10.989953 | -1.619028 | 2.732740  |
| C  | 9.945900  | -0.750652 | 3.468113  |
| C  | 8.789510  | -0.337000 | 2.621686  |
| C  | 7.515609  | -0.847296 | 2.535111  |
| N  | 8.851591  | 0.623366  | 1.608947  |
| C  | 7.656032  | 0.636370  | 0.948448  |
| N  | 6.820298  | -0.234768 | 1.497202  |
| C  | 6.027108  | -6.314114 | 3.898881  |
| C  | 4.999381  | -6.496182 | 2.756716  |
| C  | 5.032283  | -5.370010 | 1.774201  |
| C  | 4.420495  | -4.135188 | 1.730671  |
| N  | 5.977256  | -5.318250 | 0.752213  |
| C  | 5.941986  | -4.085461 | 0.170173  |
| N  | 5.000789  | -3.336996 | 0.741461  |
| C  | 10.364474 | -1.610503 | -2.898871 |
| C  | 9.057780  | -1.900604 | -3.656377 |
| C  | 7.810582  | -1.675575 | -2.875162 |
| C  | 7.545075  | -1.600003 | -1.528197 |
| N  | 6.567891  | -1.504369 | -3.482472 |
| C  | 5.617719  | -1.346594 | -2.521912 |
| N  | 6.187898  | -1.382837 | -1.322309 |
| H  | 11.449989 | -1.039451 | 1.923631  |
| H  | 10.497999 | -2.578568 | 2.337999  |
| H  | 11.766714 | -1.901571 | 3.435346  |
| H  | 9.569835  | -1.339746 | 4.310593  |
| H  | 10.458008 | 0.112829  | 3.903963  |
| H  | 9.678468  | 1.121327  | 1.305188  |
| H  | 7.032637  | -1.566242 | 3.172725  |
| H  | 7.439464  | 1.264464  | 0.102358  |
| H  | 7.019134  | -6.181436 | 3.468972  |
| H  | 6.007431  | -7.157928 | 4.684241  |
| H  | 5.754099  | -5.411575 | 4.440927  |
| H  | 5.206665  | -7.451031 | 2.262848  |
| H  | 4.004815  | -6.583910 | 3.200972  |
| H  | 6.684008  | -6.031435 | 0.559742  |
| H  | 3.552462  | -3.801718 | 2.275470  |
| H  | 6.619844  | -3.812427 | -0.621668 |
| H  | 10.624988 | -2.486908 | -2.282070 |
| H  | 10.340341 | -0.594198 | -2.369477 |
| H  | 11.122239 | -1.503884 | -3.673260 |
| H  | 9.046805  | -1.261312 | -4.547847 |
| H  | 9.110243  | -2.935702 | -4.023050 |
| H  | 6.326833  | -1.563236 | -4.470591 |
| H  | 8.226979  | -1.723044 | -0.703043 |
| H  | 4.556323  | -1.250630 | -2.708843 |
| H  | 3.082608  | 2.724710  | 1.384992  |
| H  | 4.181622  | -0.941535 | 3.123967  |
| H  | 4.762082  | 1.337651  | 2.675251  |
| H  | 2.214814  | 1.235217  | 0.944321  |
| H  | 2.938315  | -0.889033 | 2.042634  |

**<sup>1</sup>C QM/MM-Optimized Active Site (QM Region E=-4763.13683160 Eh, <S<sup>2</sup>> = 0.00)**

|    |           |           |           |
|----|-----------|-----------|-----------|
| Fe | 5.066707  | -0.894054 | 0.384850  |
| O  | 3.312164  | 0.212233  | -1.259888 |
| O  | 3.428627  | -1.149333 | -0.646976 |
| N  | 3.925353  | -0.527342 | 2.075084  |
| C  | 3.818847  | 0.931609  | 2.361647  |
| C  | 2.996994  | 1.338165  | 3.602734  |
| O  | 1.877261  | 0.707056  | 3.859313  |
| C  | 3.248960  | 1.613619  | 1.111691  |
| S  | 4.316885  | 1.198136  | -0.335565 |
| O  | 3.434966  | 2.330491  | 4.257181  |
| C  | 10.989999 | -1.648000 | 2.726000  |
| C  | 9.831616  | -0.880137 | 3.389252  |
| C  | 8.727390  | -0.483217 | 2.478768  |
| C  | 7.466296  | -1.006810 | 2.335305  |
| N  | 8.807444  | 0.541426  | 1.536173  |
| C  | 7.617297  | 0.592660  | 0.863755  |
| N  | 6.782078  | -0.328987 | 1.331627  |
| C  | 6.021000  | -6.344000 | 3.860000  |
| C  | 5.016512  | -6.277334 | 2.677958  |
| C  | 5.167220  | -5.057806 | 1.804398  |
| C  | 4.624447  | -3.781822 | 1.797703  |
| N  | 6.130536  | -5.014774 | 0.802314  |
| C  | 6.158684  | -3.763474 | 0.254256  |
| N  | 5.263263  | -2.972920 | 0.842309  |
| C  | 10.368000 | -1.604000 | -2.905000 |
| C  | 9.028478  | -1.903562 | -3.615352 |
| C  | 7.777018  | -1.615061 | -2.847664 |
| C  | 7.500203  | -1.401510 | -1.516964 |
| N  | 6.535904  | -1.512959 | -3.477944 |
| C  | 5.577492  | -1.266872 | -2.537650 |
| N  | 6.133775  | -1.171192 | -1.334360 |
| H  | 11.465638 | -1.020462 | 1.968055  |
| H  | 10.700403 | -2.653592 | 2.327063  |
| H  | 11.727170 | -1.836941 | 3.495280  |
| H  | 9.419542  | -1.513426 | 4.180625  |
| H  | 10.258704 | -0.006776 | 3.897033  |
| H  | 9.643627  | 1.056691  | 1.289884  |
| H  | 7.002859  | -1.777509 | 2.929859  |
| H  | 7.422001  | 1.261076  | 0.044228  |
| H  | 7.030169  | -6.239880 | 3.469361  |
| H  | 5.914792  | -7.227511 | 4.539306  |
| H  | 5.799537  | -5.485513 | 4.488739  |
| H  | 5.147922  | -7.187841 | 2.078836  |
| H  | 4.006516  | -6.323375 | 3.092993  |
| H  | 6.741152  | -5.792627 | 0.540769  |
| H  | 3.777092  | -3.424506 | 2.359418  |
| H  | 6.849609  | -3.522443 | -0.532348 |
| H  | 10.631659 | -2.469967 | -2.277311 |
| H  | 10.358066 | -0.611671 | -2.393461 |
| H  | 11.106193 | -1.511985 | -3.698658 |
| H  | 9.015953  | -1.310416 | -4.538694 |
| H  | 9.053153  | -2.955863 | -3.935406 |
| H  | 6.329216  | -1.642101 | -4.469635 |
| H  | 8.187030  | -1.430694 | -0.688729 |
| H  | 4.526842  | -1.173321 | -2.745953 |
| H  | 3.197298  | 2.696826  | 1.228944  |
| H  | 4.266636  | -1.005613 | 2.909728  |
| H  | 4.832869  | 1.293783  | 2.543798  |
| H  | 2.255571  | 1.227876  | 0.858260  |
| H  | 2.996476  | -0.908039 | 1.853326  |

**<sup>3</sup>C QM/MM-Optimized Active Site (QM Region E=-4763.13749575 Eh, <S<sup>2</sup>> = 2.00)**

|    |           |           |           |
|----|-----------|-----------|-----------|
| Fe | 5.072150  | -0.759389 | 0.331370  |
| O  | 3.344749  | 0.562200  | -1.307986 |
| O  | 3.426114  | -0.772128 | -0.649989 |
| N  | 3.895511  | -0.362938 | 1.997638  |
| C  | 3.759557  | 1.088614  | 2.311274  |
| C  | 2.956842  | 1.413457  | 3.588233  |
| O  | 1.863798  | 0.734807  | 3.838305  |
| C  | 3.119060  | 1.833972  | 1.125226  |
| S  | 4.136179  | 1.739741  | -0.398068 |
| O  | 3.374041  | 2.391928  | 4.277279  |
| C  | 10.990003 | -1.648011 | 2.725996  |
| C  | 9.831700  | -0.870805 | 3.379790  |
| C  | 8.737764  | -0.450907 | 2.465536  |
| C  | 7.462703  | -0.940128 | 2.328933  |
| N  | 8.837827  | 0.577390  | 1.524446  |
| C  | 7.649722  | 0.662480  | 0.858129  |
| N  | 6.794482  | -0.237569 | 1.331046  |
| C  | 6.021012  | -6.344007 | 3.860013  |
| C  | 5.022702  | -6.400969 | 2.678987  |
| C  | 5.125227  | -5.212147 | 1.769725  |
| C  | 4.558012  | -3.950021 | 1.778233  |
| N  | 6.074007  | -5.148341 | 0.754423  |
| C  | 6.064563  | -3.888351 | 0.216513  |
| N  | 5.159897  | -3.127334 | 0.819915  |
| C  | 10.368011 | -1.603996 | -2.905003 |
| C  | 9.025075  | -1.901284 | -3.611183 |
| C  | 7.777114  | -1.571562 | -2.853901 |
| C  | 7.497655  | -1.359884 | -1.524386 |
| N  | 6.550972  | -1.386430 | -3.498567 |
| C  | 5.599331  | -1.084827 | -2.570328 |
| N  | 6.148428  | -1.035066 | -1.360489 |
| H  | 11.471792 | -1.023178 | 1.969013  |
| H  | 10.697499 | -2.650819 | 2.324881  |
| H  | 11.723410 | -1.839529 | 3.497867  |
| H  | 9.403792  | -1.503998 | 4.162669  |
| H  | 10.263807 | -0.006144 | 3.898465  |
| H  | 9.683629  | 1.079156  | 1.281702  |
| H  | 6.978882  | -1.702743 | 2.920466  |
| H  | 7.457575  | 1.342315  | 0.047145  |
| H  | 7.028398  | -6.239138 | 3.462898  |
| H  | 5.930664  | -7.196094 | 4.583726  |
| H  | 5.770060  | -5.456047 | 4.434210  |
| H  | 5.201824  | -7.332119 | 2.127261  |
| H  | 4.012954  | -6.472267 | 3.092889  |
| H  | 6.711683  | -5.905389 | 0.494940  |
| H  | 3.717313  | -3.609089 | 2.361281  |
| H  | 6.741503  | -3.619964 | -0.575781 |
| H  | 10.634036 | -2.469408 | -2.277696 |
| H  | 10.363488 | -0.609706 | -2.395185 |
| H  | 11.102467 | -1.514401 | -3.702638 |
| H  | 9.024200  | -1.324948 | -4.545192 |
| H  | 9.034499  | -2.959612 | -3.910354 |
| H  | 6.345496  | -1.513601 | -4.490816 |
| H  | 8.169177  | -1.441106 | -0.686921 |
| H  | 4.560291  | -0.912772 | -2.789831 |
| H  | 2.996727  | 2.890688  | 1.373061  |
| H  | 4.218294  | -0.853202 | 2.832970  |
| H  | 4.766833  | 1.475921  | 2.480270  |
| H  | 2.139792  | 1.416026  | 0.868328  |
| H  | 2.978836  | -0.754197 | 1.746779  |

**<sup>5</sup>C QM/MM-Optimized Active Site (QM Region E=-4763.15684571 Eh, <S<sup>2</sup>> = 6.00)**

|    |           |           |           |
|----|-----------|-----------|-----------|
| Fe | 4.905920  | -0.951054 | 0.368175  |
| O  | 3.345019  | 0.696746  | -1.278664 |
| O  | 3.341579  | -0.707190 | -0.821588 |
| N  | 3.779335  | -0.435838 | 2.215089  |
| C  | 3.691503  | 1.025692  | 2.471362  |
| C  | 2.863006  | 1.415719  | 3.710011  |
| O  | 1.740565  | 0.774884  | 3.941285  |
| C  | 3.110474  | 1.759024  | 1.245823  |
| S  | 4.218532  | 1.669932  | -0.217467 |
| O  | 3.287084  | 2.396008  | 4.391046  |
| C  | 10.990013 | -1.647993 | 2.726005  |
| C  | 9.824037  | -0.862949 | 3.355979  |
| C  | 8.727814  | -0.459015 | 2.435402  |
| C  | 7.426430  | -0.891607 | 2.371306  |
| N  | 8.837543  | 0.505831  | 1.430357  |
| C  | 7.627321  | 0.606962  | 0.803183  |
| N  | 6.748361  | -0.214471 | 1.361121  |
| C  | 6.020987  | -6.344001 | 3.859989  |
| C  | 5.017045  | -6.413269 | 2.685177  |
| C  | 5.100494  | -5.229291 | 1.769873  |
| C  | 4.512296  | -3.978562 | 1.768175  |
| N  | 6.036695  | -5.166240 | 0.741978  |
| C  | 6.001527  | -3.921642 | 0.180626  |
| N  | 5.089051  | -3.165499 | 0.784964  |
| C  | 10.367997 | -1.604003 | -2.904999 |
| C  | 9.066119  | -1.927351 | -3.668012 |
| C  | 7.799394  | -1.650190 | -2.930087 |
| C  | 7.502743  | -1.495119 | -1.595808 |
| N  | 6.581031  | -1.452841 | -3.580521 |
| C  | 5.617693  | -1.201832 | -2.645102 |
| N  | 6.152789  | -1.201178 | -1.431437 |
| H  | 11.477034 | -1.033040 | 1.964650  |
| H  | 10.700604 | -2.653256 | 2.329455  |
| H  | 11.715524 | -1.830412 | 3.507534  |
| H  | 9.393947  | -1.483612 | 4.147990  |
| H  | 10.251525 | 0.011603  | 3.862439  |
| H  | 9.695937  | 0.944967  | 1.118425  |
| H  | 6.933573  | -1.603443 | 3.017787  |
| H  | 7.441169  | 1.248529  | -0.039903 |
| H  | 7.026256  | -6.233403 | 3.461496  |
| H  | 5.933829  | -7.194574 | 4.586836  |
| H  | 5.765150  | -5.455619 | 4.431400  |
| H  | 5.200879  | -7.344609 | 2.135526  |
| H  | 4.010338  | -6.491992 | 3.105323  |
| H  | 6.683762  | -5.916896 | 0.487752  |
| H  | 3.676515  | -3.637450 | 2.357237  |
| H  | 6.664114  | -3.653068 | -0.622678 |
| H  | 10.625956 | -2.467636 | -2.270843 |
| H  | 10.335601 | -0.609438 | -2.397445 |
| H  | 11.130767 | -1.498794 | -3.673591 |
| H  | 9.074206  | -1.331426 | -4.588611 |
| H  | 9.120105  | -2.978153 | -3.989243 |
| H  | 6.383473  | -1.549734 | -4.577344 |
| H  | 8.168581  | -1.593898 | -0.754078 |
| H  | 4.578280  | -1.026747 | -2.865629 |
| H  | 2.949532  | 2.812369  | 1.482435  |
| H  | 4.112422  | -0.902502 | 3.059408  |
| H  | 4.706525  | 1.384896  | 2.657048  |
| H  | 2.160515  | 1.315811  | 0.928072  |
| H  | 2.843558  | -0.805866 | 2.012959  |

**<sup>1</sup>C' QM/MM-Optimized Active Site (QM Region E=-6766.50716169 Eh, <S<sup>2</sup>> = 0.00)**

|    |           |           |           |
|----|-----------|-----------|-----------|
| Fe | 5.074317  | -0.881916 | 0.368025  |
| O  | 3.226273  | 0.118644  | -1.317695 |
| O  | 3.442856  | -1.184511 | -0.648927 |
| N  | 3.913792  | -0.491986 | 2.052110  |
| C  | 3.790587  | 0.961133  | 2.367705  |
| C  | 2.977405  | 1.334779  | 3.626155  |
| O  | 1.863931  | 0.691942  | 3.878200  |
| C  | 3.184279  | 1.673848  | 1.154609  |
| Se | 4.306277  | 1.307041  | -0.428879 |
| O  | 3.409913  | 2.323425  | 4.290496  |
| C  | 10.989999 | -1.648000 | 2.726000  |
| C  | 9.830388  | -0.880699 | 3.388225  |
| C  | 8.730209  | -0.478536 | 2.475123  |
| C  | 7.465110  | -0.992158 | 2.329874  |
| N  | 8.821463  | 0.541803  | 1.528844  |
| C  | 7.634264  | 0.599195  | 0.852370  |
| N  | 6.789421  | -0.313026 | 1.320640  |
| C  | 6.021000  | -6.344000 | 3.860000  |
| C  | 5.014081  | -6.269632 | 2.680090  |
| C  | 5.165776  | -5.047811 | 1.809487  |
| C  | 4.622603  | -3.771683 | 1.801526  |
| N  | 6.131250  | -5.004460 | 0.809464  |
| C  | 6.160434  | -3.753240 | 0.261755  |
| N  | 5.263710  | -2.962531 | 0.847609  |
| C  | 10.368000 | -1.604000 | -2.905000 |
| C  | 9.033902  | -1.907350 | -3.622983 |
| C  | 7.780532  | -1.622808 | -2.858564 |
| C  | 7.505031  | -1.404744 | -1.528458 |
| N  | 6.538600  | -1.528604 | -3.487955 |
| C  | 5.580143  | -1.282859 | -2.547339 |
| N  | 6.138632  | -1.179913 | -1.345054 |
| H  | 11.466463 | -1.020582 | 1.968411  |
| H  | 10.700865 | -2.653866 | 2.326843  |
| H  | 11.726247 | -1.836830 | 3.496237  |
| H  | 9.414660  | -1.515772 | 4.176254  |
| H  | 10.257423 | -0.009657 | 3.900125  |
| H  | 9.662138  | 1.049702  | 1.282368  |
| H  | 6.993720  | -1.757215 | 2.925775  |
| H  | 7.448905  | 1.265225  | 0.028860  |
| H  | 7.030020  | -6.105452 | 3.468630  |
| H  | 5.913272  | -7.228721 | 4.537240  |
| H  | 5.802939  | -5.486756 | 4.491857  |
| H  | 5.141546  | -7.178508 | 2.077545  |
| H  | 4.004925  | -6.314334 | 3.097080  |
| H  | 6.740412  | -5.783313 | 0.547487  |
| H  | 3.772942  | -3.414373 | 2.359917  |
| H  | 6.852331  | -3.513527 | -0.524236 |
| H  | 10.630918 | -2.469016 | -2.275693 |
| H  | 10.355922 | -0.610662 | -2.395248 |
| H  | 11.109588 | -1.511381 | -3.695481 |
| H  | 9.023711  | -1.313904 | -4.546160 |
| H  | 9.063323  | -2.959495 | -3.943156 |
| H  | 6.331077  | -1.661988 | -4.478979 |
| H  | 8.192769  | -1.427343 | -0.700795 |
| H  | 4.528650  | -1.193782 | -2.754478 |
| H  | 3.119577  | 2.751991  | 1.303118  |
| H  | 4.249688  | -0.980317 | 2.883150  |
| H  | 4.801719  | 1.332808  | 2.546363  |
| H  | 2.197753  | 1.277128  | 0.893674  |
| H  | 2.989838  | -0.878208 | 1.818656  |

**<sup>3</sup>C' QM/MM-Optimized Active Site (QM Region E=-6766.50919534 Eh, <S<sup>2</sup>> = 2.00)**

|    |           |           |           |
|----|-----------|-----------|-----------|
| Fe | 5.069125  | -0.753649 | 0.318586  |
| O  | 3.312194  | 0.451829  | -1.391119 |
| O  | 3.422255  | -0.808241 | -0.635315 |
| N  | 3.896956  | -0.347595 | 1.993950  |
| C  | 3.746440  | 1.099649  | 2.321477  |
| C  | 2.953391  | 1.404514  | 3.611808  |
| O  | 1.862617  | 0.722337  | 3.859440  |
| C  | 3.067517  | 1.849076  | 1.164995  |
| Se | 4.125839  | 1.836588  | -0.493309 |
| O  | 3.372287  | 2.377784  | 4.307370  |
| C  | 10.989996 | -1.648007 | 2.725995  |
| C  | 9.826439  | -0.872732 | 3.373559  |
| C  | 8.735896  | -0.452178 | 2.454890  |
| C  | 7.458403  | -0.935251 | 2.317463  |
| N  | 8.841880  | 0.573824  | 1.511614  |
| C  | 7.655286  | 0.663220  | 0.843749  |
| N  | 6.794521  | -0.231212 | 1.317057  |
| C  | 6.021015  | -6.344011 | 3.860020  |
| C  | 5.022466  | -6.400981 | 2.679356  |
| C  | 5.123724  | -5.211082 | 1.771942  |
| C  | 4.556172  | -3.949153 | 1.783430  |
| N  | 6.072293  | -5.145053 | 0.756815  |
| C  | 6.061857  | -3.883800 | 0.221454  |
| N  | 5.157585  | -3.124188 | 0.826924  |
| C  | 10.368003 | -1.603994 | -2.905004 |
| C  | 9.029477  | -1.904056 | -3.617311 |
| C  | 7.778618  | -1.577651 | -2.864296 |
| C  | 7.495114  | -1.363664 | -1.536023 |
| N  | 6.554585  | -1.394700 | -3.512929 |
| C  | 5.600072  | -1.091770 | -2.588069 |
| N  | 6.145414  | -1.038929 | -1.376476 |
| H  | 11.472552 | -1.023439 | 1.969281  |
| H  | 10.700688 | -2.652618 | 2.326292  |
| H  | 11.720639 | -1.835915 | 3.501466  |
| H  | 9.395201  | -1.506829 | 4.153968  |
| H  | 10.254893 | -0.007896 | 3.895149  |
| H  | 9.690055  | 1.071410  | 1.268440  |
| H  | 6.970685  | -1.694830 | 2.909886  |
| H  | 7.467398  | 1.342644  | 0.031591  |
| H  | 7.028735  | -6.238843 | 3.463502  |
| H  | 5.929764  | -7.196289 | 4.583587  |
| H  | 5.770120  | -5.455853 | 4.434208  |
| H  | 5.202254  | -7.331483 | 2.126744  |
| H  | 4.012901  | -6.473533 | 3.093631  |
| H  | 6.709685  | -5.901751 | 0.495750  |
| H  | 3.715529  | -3.609906 | 2.367628  |
| H  | 6.737489  | -3.613691 | -0.571178 |
| H  | 10.632373 | -2.468997 | -2.276473 |
| H  | 10.361391 | -0.608903 | -2.396234 |
| H  | 11.105631 | -1.513833 | -3.699688 |
| H  | 9.030979  | -1.326660 | -4.550649 |
| H  | 9.042904  | -2.962056 | -3.917575 |
| H  | 6.351526  | -1.524746 | -4.505310 |
| H  | 8.164535  | -1.442166 | -0.696658 |
| H  | 4.563135  | -0.915159 | -2.813648 |
| H  | 2.923194  | 2.898662  | 1.426957  |
| H  | 4.226124  | -0.841464 | 2.824699  |
| H  | 4.749729  | 1.499455  | 2.482957  |
| H  | 2.101640  | 1.407087  | 0.901048  |
| H  | 2.982438  | -0.744950 | 1.744915  |

**<sup>5</sup>C' QM/MM-Optimized Active Site (QM Region E=-6766.52804049 Eh, <S<sup>2</sup>> = 6.00)**

|    |           |           |           |
|----|-----------|-----------|-----------|
| Fe | 4.905946  | -0.951626 | 0.360064  |
| O  | 3.281124  | 0.591677  | -1.367766 |
| O  | 3.336475  | -0.765396 | -0.823202 |
| N  | 3.768942  | -0.421206 | 2.198055  |
| C  | 3.672984  | 1.035880  | 2.476359  |
| C  | 2.852623  | 1.404913  | 3.729161  |
| O  | 1.732588  | 0.759915  | 3.958604  |
| C  | 3.062695  | 1.785454  | 1.279870  |
| Se | 4.218924  | 1.767670  | -0.316256 |
| O  | 3.277970  | 2.380362  | 4.416691  |
| C  | 10.990013 | -1.647993 | 2.726005  |
| C  | 9.822419  | -0.865693 | 3.356739  |
| C  | 8.727944  | -0.460397 | 2.434791  |
| C  | 7.425050  | -0.888450 | 2.369174  |
| N  | 8.843639  | 0.500102  | 1.426282  |
| C  | 7.635855  | 0.602332  | 0.795440  |
| N  | 6.751825  | -0.212994 | 1.354200  |
| C  | 6.020987  | -6.344001 | 3.859989  |
| C  | 5.014535  | -6.412762 | 2.687318  |
| C  | 5.097145  | -5.228568 | 1.772576  |
| C  | 4.510787  | -3.976968 | 1.773395  |
| N  | 6.032833  | -5.165271 | 0.744350  |
| C  | 5.999380  | -3.919530 | 0.185444  |
| N  | 5.088606  | -3.162996 | 0.791725  |
| C  | 10.367997 | -1.604003 | -2.904999 |
| C  | 9.069573  | -1.931311 | -3.672095 |
| C  | 7.800865  | -1.656157 | -2.937252 |
| C  | 7.502741  | -1.501896 | -1.603301 |
| N  | 6.582880  | -1.460342 | -3.588920 |
| C  | 5.618068  | -1.211921 | -2.654114 |
| N  | 6.152199  | -1.211171 | -1.439865 |
| H  | 11.476240 | -1.031732 | 1.965245  |
| H  | 10.701329 | -2.653066 | 2.327974  |
| H  | 11.715513 | -1.830495 | 3.507484  |
| H  | 9.391489  | -1.488705 | 4.146467  |
| H  | 10.248485 | 0.007886  | 3.866107  |
| H  | 9.704000  | 0.934828  | 1.113488  |
| H  | 6.928783  | -1.597127 | 3.016682  |
| H  | 7.455611  | 1.240564  | -0.051210 |
| H  | 7.025917  | -6.234165 | 3.459710  |
| H  | 5.933242  | -7.194840 | 4.586876  |
| H  | 5.767000  | -5.455555 | 4.432100  |
| H  | 5.196678  | -7.344172 | 2.137238  |
| H  | 4.008612  | -6.490728 | 3.109481  |
| H  | 6.678342  | -5.916612 | 0.488087  |
| H  | 3.675734  | -3.635805 | 2.363507  |
| H  | 6.661634  | -3.650962 | -0.618064 |
| H  | 10.626385 | -2.466375 | -2.269399 |
| H  | 10.331996 | -0.608290 | -2.385422 |
| H  | 11.132534 | -1.497375 | -3.671712 |
| H  | 9.079082  | -1.336131 | -4.593143 |
| H  | 9.126961  | -2.982274 | -3.992338 |
| H  | 6.385739  | -1.557626 | -4.585829 |
| H  | 8.167959  | -1.600222 | -0.761042 |
| H  | 4.578793  | -1.039318 | -2.876785 |
| H  | 2.893529  | 2.832611  | 1.533248  |
| H  | 4.095392  | -0.898046 | 3.039330  |
| H  | 4.686736  | 1.399969  | 2.658639  |
| H  | 2.120321  | 1.334717  | 0.952124  |
| H  | 2.835518  | -0.791786 | 1.985074  |

**<sup>1</sup>D QM/MM-Optimized Active Site (QM Region E=-4763.13432261 Eh, <S<sup>2</sup>> = 0.00)**

|    |           |           |           |
|----|-----------|-----------|-----------|
| Fe | 5.005662  | -0.938074 | 0.357875  |
| O  | 3.602823  | -1.102911 | -0.495083 |
| O  | 4.256050  | 1.644776  | -1.567043 |
| N  | 3.916692  | -0.539226 | 2.049796  |
| C  | 3.832486  | 0.924704  | 2.330653  |
| C  | 2.973693  | 1.331676  | 3.545479  |
| O  | 1.859457  | 0.684409  | 3.781492  |
| C  | 3.364102  | 1.604788  | 1.039565  |
| S  | 4.765723  | 1.392797  | -0.151898 |
| O  | 3.388845  | 2.323938  | 4.214021  |
| C  | 10.990000 | -1.648000 | 2.726000  |
| C  | 9.827601  | -0.893625 | 3.398668  |
| C  | 8.729793  | -0.482673 | 2.484862  |
| C  | 7.453888  | -0.969697 | 2.345962  |
| N  | 8.841626  | 0.518402  | 1.518687  |
| C  | 7.662806  | 0.590826  | 0.838415  |
| N  | 6.794229  | -0.288930 | 1.324181  |
| C  | 6.021000  | -6.344000 | 3.860000  |
| C  | 5.017363  | -6.288394 | 2.679700  |
| C  | 5.185616  | -5.069650 | 1.815121  |
| C  | 4.689535  | -3.777856 | 1.843529  |
| N  | 6.156857  | -5.036636 | 0.820569  |
| C  | 6.240234  | -3.776353 | 0.308784  |
| N  | 5.373142  | -2.972165 | 0.920208  |
| C  | 10.368000 | -1.604000 | -2.905000 |
| C  | 9.022895  | -1.891616 | -3.617820 |
| C  | 7.764014  | -1.612451 | -2.851695 |
| C  | 7.478467  | -1.442402 | -1.516717 |
| N  | 6.527498  | -1.463945 | -3.487207 |
| C  | 5.566389  | -1.224410 | -2.549351 |
| N  | 6.113941  | -1.192934 | -1.342199 |
| H  | 11.458408 | -1.011925 | 1.966273  |
| H  | 10.691641 | -2.651270 | 2.321226  |
| H  | 11.739566 | -1.837866 | 3.484545  |
| H  | 9.414457  | -1.541903 | 4.177137  |
| H  | 10.250082 | -0.028414 | 3.923352  |
| H  | 9.685202  | 1.023236  | 1.274411  |
| H  | 6.968065  | -1.716636 | 2.953472  |
| H  | 7.489884  | 1.258833  | 0.015445  |
| H  | 7.032272  | -6.242041 | 3.472176  |
| H  | 5.911657  | -7.227013 | 4.539801  |
| H  | 5.799130  | -5.482718 | 4.485119  |
| H  | 5.149229  | -7.200524 | 2.083811  |
| H  | 4.006461  | -6.330149 | 3.092719  |
| H  | 6.728797  | -5.834959 | 0.537117  |
| H  | 3.847571  | -3.405820 | 2.404125  |
| H  | 6.933501  | -3.542731 | -0.477519 |
| H  | 10.603242 | -2.463984 | -2.260773 |
| H  | 10.356578 | -0.608471 | -2.397276 |
| H  | 11.120974 | -1.533255 | -3.686720 |
| H  | 9.010574  | -1.286407 | -4.532369 |
| H  | 9.046368  | -2.940111 | -3.949174 |
| H  | 6.320997  | -1.563615 | -4.482206 |
| H  | 8.159844  | -1.497560 | -0.684903 |
| H  | 4.523149  | -1.063038 | -2.757494 |
| H  | 3.181197  | 2.672058  | 1.176547  |
| H  | 4.242513  | -1.024104 | 2.887051  |
| H  | 4.845740  | 1.261636  | 2.566003  |
| H  | 2.480931  | 1.120145  | 0.613369  |
| H  | 2.983534  | -0.901052 | 1.811190  |



**<sup>3</sup>D QM/MM-Optimized Active Site (QM Region E=-4763.17961518 Eh, <S<sup>2</sup>> = 2.02)**

|    |           |           |           |
|----|-----------|-----------|-----------|
| Fe | 4.984098  | -0.710493 | 0.366834  |
| O  | 3.615090  | -1.030223 | -0.467434 |
| O  | 4.083102  | 1.919103  | -1.492529 |
| N  | 3.941974  | -0.358890 | 2.115429  |
| C  | 3.800184  | 1.097824  | 2.399036  |
| C  | 2.980324  | 1.495184  | 3.647286  |
| O  | 1.918583  | 0.806539  | 3.978651  |
| C  | 3.247993  | 1.764915  | 1.130344  |
| S  | 4.632258  | 1.678148  | -0.088883 |
| O  | 3.399521  | 2.540520  | 4.230152  |
| C  | 10.989985 | -1.647990 | 2.726007  |
| C  | 9.835772  | -0.861335 | 3.376159  |
| C  | 8.748546  | -0.418389 | 2.465780  |
| C  | 7.444575  | -0.837012 | 2.371240  |
| N  | 8.882626  | 0.578053  | 1.496359  |
| C  | 7.685319  | 0.716859  | 0.859198  |
| N  | 6.789794  | -0.119463 | 1.372824  |
| C  | 6.021006  | -6.344013 | 3.859993  |
| C  | 5.031364  | -6.319153 | 2.667923  |
| C  | 5.190939  | -5.109718 | 1.793395  |
| C  | 4.667222  | -3.828649 | 1.824280  |
| N  | 6.166289  | -5.049801 | 0.804098  |
| C  | 6.217277  | -3.775970 | 0.304262  |
| N  | 5.329176  | -3.000160 | 0.912252  |
| C  | 10.367983 | -1.603999 | -2.904997 |
| C  | 8.998728  | -1.861291 | -3.579864 |
| C  | 7.769134  | -1.487758 | -2.809945 |
| C  | 7.494130  | -1.303592 | -1.474084 |
| N  | 6.546391  | -1.260324 | -3.446789 |
| C  | 5.601331  | -0.964887 | -2.511855 |
| N  | 6.149129  | -0.962768 | -1.304471 |
| H  | 11.495405 | -1.028741 | 1.981499  |
| H  | 10.692060 | -2.649300 | 2.324179  |
| H  | 11.707507 | -1.855717 | 3.510063  |
| H  | 9.395697  | -1.494073 | 4.153104  |
| H  | 10.276333 | -0.005779 | 3.903197  |
| H  | 9.748473  | 1.029581  | 1.226702  |
| H  | 6.943344  | -1.569825 | 2.985972  |
| H  | 7.517202  | 1.393148  | 0.040947  |
| H  | 7.033165  | -6.248172 | 3.473804  |
| H  | 5.911933  | -7.227929 | 4.538351  |
| H  | 5.790223  | -5.476225 | 4.473556  |
| H  | 5.177279  | -7.239781 | 2.088546  |
| H  | 4.016004  | -6.359743 | 3.071143  |
| H  | 6.775744  | -5.824442 | 0.528416  |
| H  | 3.815787  | -3.479471 | 2.386635  |
| H  | 6.913072  | -3.515109 | -0.473816 |
| H  | 10.633577 | -2.479782 | -2.294139 |
| H  | 10.404174 | -0.619697 | -2.374407 |
| H  | 11.084557 | -1.524323 | -3.719078 |
| H  | 9.000746  | -1.306958 | -4.527421 |
| H  | 8.963975  | -2.924133 | -3.856261 |
| H  | 6.331438  | -1.354574 | -4.440058 |
| H  | 8.166632  | -1.416662 | -0.640894 |
| H  | 4.567784  | -0.752574 | -2.724137 |
| H  | 2.985889  | 2.811431  | 1.294090  |
| H  | 4.344695  | -0.834067 | 2.924214  |
| H  | 4.806918  | 1.478021  | 2.596564  |
| H  | 2.395328  | 1.219229  | 0.715469  |
| H  | 3.020985  | -0.777970 | 1.929007  |

**<sup>5</sup>D QM/MM-Optimized Active Site (QM Region E=-4763.17117216 Eh, <S<sup>2</sup>> = 6.01)**

|    |           |           |           |
|----|-----------|-----------|-----------|
| Fe | 4.838275  | -0.885758 | 0.303413  |
| O  | 3.419228  | -0.923377 | -0.630617 |
| O  | 3.968835  | 2.030065  | -1.395305 |
| N  | 3.842103  | -0.452356 | 2.266267  |
| C  | 3.738718  | 1.015699  | 2.491399  |
| C  | 2.893753  | 1.439467  | 3.709394  |
| O  | 1.779491  | 0.795497  | 3.957653  |
| C  | 3.197810  | 1.690679  | 1.216296  |
| S  | 4.551662  | 1.670462  | -0.033961 |
| O  | 3.315301  | 2.442434  | 4.357354  |
| C  | 10.989998 | -1.648000 | 2.726000  |
| C  | 9.810814  | -0.876770 | 3.350477  |
| C  | 8.720772  | -0.469896 | 2.423223  |
| C  | 7.416975  | -0.895406 | 2.340232  |
| N  | 8.844122  | 0.507747  | 1.433265  |
| C  | 7.640368  | 0.625426  | 0.799461  |
| N  | 6.749441  | -0.199375 | 1.334672  |
| C  | 6.020998  | -6.343997 | 3.859998  |
| C  | 5.022239  | -6.372495 | 2.676980  |
| C  | 5.132642  | -5.174589 | 1.779766  |
| C  | 4.558593  | -3.915937 | 1.782587  |
| N  | 6.090518  | -5.107720 | 0.773336  |
| C  | 6.084893  | -3.854015 | 0.230608  |
| N  | 5.171163  | -3.095266 | 0.827707  |
| C  | 10.368005 | -1.604000 | -2.905001 |
| C  | 9.054991  | -1.913709 | -3.656099 |
| C  | 7.795532  | -1.613510 | -2.913714 |
| C  | 7.509416  | -1.435080 | -1.581377 |
| N  | 6.573294  | -1.413499 | -3.560961 |
| C  | 5.618168  | -1.139192 | -2.628859 |
| N  | 6.162264  | -1.125010 | -1.417842 |
| H  | 11.477385 | -1.028288 | 1.968886  |
| H  | 10.709274 | -2.655921 | 2.329194  |
| H  | 11.711268 | -1.825607 | 3.512622  |
| H  | 9.378066  | -1.505741 | 4.134448  |
| H  | 10.227062 | -0.002754 | 3.867196  |
| H  | 9.706148  | 0.952247  | 1.139486  |
| H  | 6.918027  | -1.613920 | 2.973498  |
| H  | 7.470025  | 1.284544  | -0.032782 |
| H  | 7.029593  | -6.237393 | 3.468271  |
| H  | 5.924015  | -7.205512 | 4.571047  |
| H  | 5.774596  | -5.463184 | 4.447623  |
| H  | 5.193564  | -7.297104 | 2.111758  |
| H  | 4.012004  | -6.441737 | 3.089403  |
| H  | 6.725639  | -5.866749 | 0.513995  |
| H  | 3.709634  | -3.576746 | 2.353408  |
| H  | 6.765853  | -3.587897 | -0.557883 |
| H  | 10.625380 | -2.470213 | -2.274410 |
| H  | 10.347921 | -0.609841 | -2.394560 |
| H  | 11.124068 | -1.504243 | -3.680779 |
| H  | 9.065296  | -1.323413 | -4.580292 |
| H  | 9.090882  | -2.966974 | -3.970970 |
| H  | 6.372209  | -1.515473 | -4.556818 |
| H  | 8.178338  | -1.526710 | -0.741838 |
| H  | 4.578952  | -0.953814 | -2.843840 |
| H  | 2.925932  | 2.732289  | 1.398845  |
| H  | 4.234598  | -0.899151 | 3.095594  |
| H  | 4.749251  | 1.380675  | 2.695749  |
| H  | 2.349871  | 1.147352  | 0.788246  |
| H  | 2.905640  | -0.842213 | 2.105366  |

**<sup>1</sup>D' QM/MM-Optimized Active Site (QM Region E= -6766.49780660 Eh, <S<sup>2</sup>> = 0.00)**

|    |           |           |           |
|----|-----------|-----------|-----------|
| Fe | 5.020928  | -0.923464 | 0.363639  |
| O  | 3.612532  | -1.061339 | -0.489933 |
| O  | 4.051015  | 1.669899  | -1.755672 |
| N  | 3.915723  | -0.495846 | 2.054992  |
| C  | 3.803292  | 0.965513  | 2.351136  |
| C  | 2.964156  | 1.346732  | 3.589959  |
| O  | 1.860555  | 0.687127  | 3.840761  |
| C  | 3.270929  | 1.664801  | 1.095239  |
| Se | 4.725730  | 1.496984  | -0.244782 |
| O  | 3.379716  | 2.344623  | 4.250546  |
| C  | 10.989998 | -1.648000 | 2.726000  |
| C  | 9.834025  | -0.864778 | 3.376463  |
| C  | 8.745438  | -0.452431 | 2.454661  |
| C  | 7.451316  | -0.897579 | 2.349660  |
| N  | 8.882747  | 0.506629  | 1.450608  |
| C  | 7.699925  | 0.593124  | 0.778859  |
| N  | 6.805620  | -0.236794 | 1.305910  |
| C  | 6.020998  | -6.343997 | 3.859998  |
| C  | 5.025062  | -6.277191 | 2.673690  |
| C  | 5.201800  | -5.049734 | 1.821246  |
| C  | 4.698444  | -3.760033 | 1.850308  |
| N  | 6.189574  | -5.002669 | 0.842953  |
| C  | 6.275123  | -3.738471 | 0.342839  |
| N  | 5.393280  | -2.942939 | 0.944216  |
| C  | 10.368005 | -1.604000 | -2.905001 |
| C  | 9.021710  | -1.890159 | -3.615367 |
| C  | 7.767239  | -1.590994 | -2.852508 |
| C  | 7.480774  | -1.453851 | -1.514954 |
| N  | 6.538538  | -1.390794 | -3.488327 |
| C  | 5.578058  | -1.158596 | -2.548422 |
| N  | 6.121393  | -1.178039 | -1.338139 |
| H  | 11.483315 | -1.031604 | 1.970045  |
| H  | 10.694168 | -2.653088 | 2.330211  |
| H  | 11.716534 | -1.842447 | 3.504411  |
| H  | 9.404753  | -1.491518 | 4.163900  |
| H  | 10.268226 | 0.002916  | 3.888212  |
| H  | 9.745372  | 0.958229  | 1.170339  |
| H  | 6.951051  | -1.611932 | 2.985593  |
| H  | 7.548688  | 1.230827  | -0.072125 |
| H  | 7.035013  | -6.248744 | 3.478196  |
| H  | 5.905981  | -7.223051 | 4.543060  |
| H  | 5.801859  | -5.479524 | 4.482218  |
| H  | 5.159044  | -7.184342 | 2.070855  |
| H  | 4.011481  | -6.318582 | 3.079668  |
| H  | 6.782442  | -5.789736 | 0.567462  |
| H  | 3.846863  | -3.395629 | 2.401219  |
| H  | 6.982740  | -3.498879 | -0.429088 |
| H  | 10.628859 | -2.472046 | -2.279002 |
| H  | 10.365949 | -0.611318 | -2.393006 |
| H  | 11.104181 | -1.515801 | -3.701100 |
| H  | 9.016282  | -1.295463 | -4.537457 |
| H  | 9.037695  | -2.941809 | -3.937636 |
| H  | 6.335471  | -1.460241 | -4.486457 |
| H  | 8.159533  | -1.553868 | -0.685214 |
| H  | 4.540805  | -0.959544 | -2.756239 |
| H  | 3.076175  | 2.724663  | 1.262121  |
| H  | 4.237672  | -0.980066 | 2.894173  |
| H  | 4.813824  | 1.322428  | 2.570305  |
| H  | 2.388688  | 1.170985  | 0.680518  |
| H  | 2.988825  | -0.869224 | 1.809245  |

**<sup>3</sup>D' QM/MM-Optimized Active Site (QM Region E= -6766.54279896 Eh, <S<sup>2</sup>> = 2.02)**

|    |           |           |           |
|----|-----------|-----------|-----------|
| Fe | 4.981035  | -0.763453 | 0.298269  |
| O  | 3.608458  | -1.062580 | -0.534609 |
| O  | 3.927013  | 1.887156  | -1.737442 |
| N  | 3.930262  | -0.370148 | 2.040277  |
| C  | 3.786766  | 1.081922  | 2.356454  |
| C  | 2.957312  | 1.419167  | 3.615060  |
| O  | 1.868265  | 0.737432  | 3.860533  |
| C  | 3.210120  | 1.787656  | 1.122119  |
| Se | 4.646886  | 1.720728  | -0.244742 |
| O  | 3.368717  | 2.406458  | 4.293717  |
| C  | 10.989984 | -1.647991 | 2.726003  |
| C  | 9.819475  | -0.871508 | 3.360055  |
| C  | 8.739796  | -0.444832 | 2.431283  |
| C  | 7.441517  | -0.877093 | 2.315326  |
| N  | 8.881322  | 0.544960  | 1.456064  |
| C  | 7.696264  | 0.664942  | 0.794677  |
| N  | 6.797047  | -0.173494 | 1.299383  |
| C  | 6.020999  | -6.344003 | 3.859999  |
| C  | 5.027168  | -6.358690 | 2.672808  |
| C  | 5.165463  | -5.155079 | 1.786301  |
| C  | 4.640908  | -3.874096 | 1.816231  |
| N  | 6.131172  | -5.099342 | 0.787800  |
| C  | 6.176083  | -3.828338 | 0.280915  |
| N  | 5.292733  | -3.049786 | 0.892040  |
| C  | 10.367989 | -1.604000 | -2.905001 |
| C  | 9.023871  | -1.902462 | -3.610256 |
| C  | 7.773472  | -1.570992 | -2.856199 |
| C  | 7.484460  | -1.386155 | -1.523922 |
| N  | 6.556300  | -1.353515 | -3.506692 |
| C  | 5.599601  | -1.061227 | -2.581871 |
| N  | 6.136875  | -1.052815 | -1.368628 |
| H  | 11.482055 | -1.028915 | 1.971022  |
| H  | 10.702398 | -2.654961 | 2.329087  |
| H  | 11.711853 | -1.833783 | 3.510462  |
| H  | 9.378285  | -1.504844 | 4.135540  |
| H  | 10.244319 | -0.007764 | 3.886716  |
| H  | 9.746804  | 0.999514  | 1.189166  |
| H  | 6.935824  | -1.607942 | 2.928851  |
| H  | 7.544347  | 1.328374  | -0.036787 |
| H  | 7.032822  | -6.244714 | 3.471999  |
| H  | 5.917960  | -7.205047 | 4.569768  |
| H  | 5.781237  | -5.461403 | 4.448299  |
| H  | 5.190736  | -7.282896 | 2.104685  |
| H  | 4.014086  | -6.416622 | 3.079979  |
| H  | 6.743876  | -5.872774 | 0.516954  |
| H  | 3.796334  | -3.522064 | 2.386990  |
| H  | 6.867368  | -3.571764 | -0.501923 |
| H  | 10.633750 | -2.468971 | -2.276839 |
| H  | 10.361913 | -0.608533 | -2.396609 |
| H  | 11.102441 | -1.514720 | -3.702649 |
| H  | 9.022824  | -1.327522 | -4.544780 |
| H  | 9.033412  | -2.961093 | -3.908211 |
| H  | 6.356121  | -1.457948 | -4.502544 |
| H  | 8.149377  | -1.491439 | -0.683920 |
| H  | 4.566774  | -0.854618 | -2.804533 |
| H  | 2.969802  | 2.832814  | 1.317161  |
| H  | 4.319956  | -0.859277 | 2.847450  |
| H  | 4.791313  | 1.461065  | 2.567040  |
| H  | 2.345028  | 1.264108  | 0.706967  |
| H  | 3.007685  | -0.781542 | 1.844070  |

**<sup>5</sup>D' QM/MM-Optimized Active Site (QM Region E=-6766.54661367 Eh, <S<sup>2</sup>> = 6.00)**

|    |           |           |           |
|----|-----------|-----------|-----------|
| Fe | 4.987427  | -0.899801 | 0.319911  |
| O  | 3.629396  | -0.810650 | -0.613992 |
| O  | 5.535840  | 2.833547  | 0.277074  |
| N  | 3.909056  | -0.490449 | 2.043293  |
| C  | 3.802685  | 0.976819  | 2.315039  |
| C  | 3.074687  | 1.363141  | 3.613701  |
| O  | 1.946098  | 0.755257  | 3.902751  |
| C  | 3.099471  | 1.665368  | 1.122787  |
| Se | 3.981715  | 3.353961  | 0.648140  |
| O  | 3.570273  | 2.330661  | 4.263525  |
| C  | 10.990024 | -1.648017 | 2.725992  |
| C  | 9.806369  | -0.905348 | 3.379735  |
| C  | 8.706430  | -0.492107 | 2.464259  |
| C  | 7.454742  | -1.025626 | 2.286993  |
| N  | 8.762694  | 0.593823  | 1.584895  |
| C  | 7.573408  | 0.676503  | 0.921037  |
| N  | 6.754503  | -0.285571 | 1.337024  |
| C  | 6.020997  | -6.343993 | 3.859997  |
| C  | 5.014479  | -6.431445 | 2.688942  |
| C  | 5.117692  | -5.261148 | 1.756628  |
| C  | 4.561442  | -3.995187 | 1.755671  |
| N  | 6.069822  | -5.210993 | 0.743348  |
| C  | 6.075900  | -3.955195 | 0.198686  |
| N  | 5.176041  | -3.184788 | 0.796590  |
| C  | 10.368039 | -1.604001 | -2.905001 |
| C  | 9.026065  | -1.902574 | -3.609195 |
| C  | 7.782033  | -1.575820 | -2.847563 |
| C  | 7.496770  | -1.417460 | -1.510738 |
| N  | 6.558756  | -1.373898 | -3.489297 |
| C  | 5.601020  | -1.119170 | -2.555779 |
| N  | 6.143852  | -1.119435 | -1.345765 |
| H  | 11.444195 | -1.002739 | 1.970103  |
| H  | 10.713247 | -2.649132 | 2.311494  |
| H  | 11.737818 | -1.835959 | 3.492836  |
| H  | 9.387521  | -1.556879 | 4.152365  |
| H  | 10.212526 | -0.037356 | 3.913222  |
| H  | 9.579630  | 1.160094  | 1.390960  |
| H  | 6.998030  | -1.834494 | 2.833560  |
| H  | 7.330540  | 1.431265  | 0.193308  |
| H  | 7.025213  | -6.244839 | 3.449000  |
| H  | 5.938791  | -7.179360 | 4.604147  |
| H  | 5.768930  | -5.445384 | 4.416055  |
| H  | 5.190515  | -7.375018 | 2.158326  |
| H  | 4.007304  | -6.490117 | 3.111867  |
| H  | 6.715806  | -5.966222 | 0.499586  |
| H  | 3.717511  | -3.645090 | 2.328318  |
| H  | 6.761010  | -3.694866 | -0.590004 |
| H  | 10.643140 | -2.470537 | -2.283678 |
| H  | 10.363383 | -0.616650 | -2.378686 |
| H  | 11.099714 | -1.504170 | -3.702462 |
| H  | 9.022951  | -1.340243 | -4.551487 |
| H  | 9.031767  | -2.963662 | -3.893775 |
| H  | 6.349907  | -1.469659 | -4.483212 |
| H  | 8.165560  | -1.518385 | -0.672921 |
| H  | 4.558427  | -0.949355 | -2.761889 |
| H  | 2.046615  | 1.886320  | 1.318929  |
| H  | 4.298161  | -0.954086 | 2.866732  |
| H  | 4.829419  | 1.333578  | 2.408201  |
| H  | 3.160326  | 1.015458  | 0.238042  |
| H  | 2.979724  | -0.887915 | 1.866912  |

**<sup>2</sup>NO QM-Optimized Structure (E=-129.939747427 Eh)**

|   |          |          |           |
|---|----------|----------|-----------|
| N | 0.000000 | 0.000000 | -0.611833 |
| O | 0.000000 | 0.000000 | 0.535353  |

**<sup>3</sup>O<sub>2</sub> QM-Optimized Structure (E=-150.382047430 Eh)**

|   |          |          |           |
|---|----------|----------|-----------|
| O | 0.000000 | 0.000000 | 0.604043  |
| O | 0.000000 | 0.000000 | -0.604043 |
